# Supplementary material for: Synthesis of tricyclic 3-hydroxyisoindolin-1-ones via triethylamine-catalyzed domino reactions of electron-deficient alkynes with phthalimidomalonate derivatives
Source: Royal Society of Chemistry journal article supplement (doi:10.1039/c6qo00544f), 2016-10-25

## Supporting information

# Synthesis of Tricyclic 3-Hydroxyisoindolin-1-ones via Triethylamine-Catalyzed Domino Reactions of Electron-Deficient Alkynes with Phthalimidomalonate Derivatives

Li Zhang, Beichen Zhang, Teng Jiang, Tao Lu\* and Qingfa Zhou\*

*State Key Laboratory of Natural Medicines, Department of Organic Chemistry, China Pharmaceutical University,  
Nanjing, 210009, P. R. China. Fax: +86-025-86285179; Tele.: +86-025-86185160.  
E-mail: zhouqingfa@cpu.edu.cn, lut163@163.com*

## Contents

|                                                                                   |                |
|-----------------------------------------------------------------------------------|----------------|
| <b>I. Instrumentation and chemicals</b>                                           | <b>S2</b>      |
| <b>II. Optimization study of Triethylamine - Catalyzed Domino Reactions of 3a</b> | <b>S3</b>      |
| <b>III. Synthetic procedures and characterization data</b>                        | <b>S4-S17</b>  |
| <b>IV. X-Ray crystallographic analysis of 3m</b>                                  | <b>S18-S19</b> |
| <b>V. NMR spectra</b>                                                             | <b>S20-S42</b> |

## I. Instrumentation and chemicals

All reactions were performed under N<sub>2</sub> unless otherwise indicated. Reagents and solvents were purchased as reagent grade and were used without further purification. Flash column chromatography was performed over silica gel (200 - 300 m) using a mixture of ethyl acetate (EA) and petroleum ether (PE).

<sup>1</sup>H NMR and <sup>13</sup>C NMR spectra were obtained at room temperature using a Bruker Avance 300 spectrometer. DMSO-d<sub>6</sub> containing 0.03% tetramethylsilane (TMS) (99.8%D, Adamas, Inc.) was used as a solvent for NMR measurements. Chemical shifts (δ) for <sup>1</sup>H NMR are given in parts per million (ppm) relative to residual DMSO (δ 2.50 ppm) or H<sub>2</sub>O (δ 3.33 ppm). Chemical shifts (δ) for <sup>13</sup>C NMR are given in ppm relative to DMSO (δ 39.50 ppm). The abbreviations s, d, t, q and m signify singlet, doublet, triplet, quartet and multiplet, respectively.

High resolution mass spectrometry (HRMS) was obtained on a Q-TOF micro spectrometer. Melting points were determined with a Micro melting point apparatus. TLC plates were visualized by exposure to ultraviolet light.

## II. Optimization study of Triethylamine - Catalyzed Domino Reactions of **3a**

### General procedure for Optimization study of Triethylamine - Catalyzed Domino Reactions of **3a**

To a mixture of **1a** (122 mg, 0.4 mmol) and **2a** (128 mg, 0.8 mmol) in solvent (5 mL) catalyst was added. The resulting solution was stirred at different temperature until the TLC indicated that the total consumption of **1a**. After removal of solvent, the residue was column chromatographed on silica and eluted with PE/EA (5:1) to give **3a**.

### III. Synthetic procedures and characterization data

#### General procedure for synthesis of Tricyclic 3-Hydroxyisoindolin-1-ones (3)

To a mixture of phthalimidomalonate derivative **1** (0.4 mmol) and electron - deficient alkyne **2** (0.8 mmol) in CH<sub>3</sub>CN (5 mL) Et<sub>3</sub>N (8.0 mg, 0.08 mol) was added. The resulting solution was stirred at 0 °C for 100 h. After removal of solvent, the residue was column chromatographed on silica and eluted with PE/EA (5:1) to give tricyclic 3-hydroxyisoindolin-1-ones (**3**).

#### 1-benzyl3,3-diethyl9b-hydroxy-5-oxo-5,9b-hydroxy-3H-pyrrolo[2,1-a]isoindole-1,3,3-tricarboxylate (**3a**)

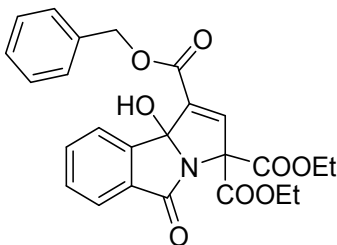

Yield: 55% (102.2 mg, 0.220 mmol);

White solid (mp 119-121 °C);

<sup>1</sup>H NMR (DMSO) δ 7.95 (d, *J* = 7.5 Hz, 1H), 7.73 - 7.55 (m, 3H), 7.55 - 7.30 (m, 6H), 7.16 (s, 1H), 5.41 - 5.25 (m, 2H), 4.47 - 4.01 (m, 4H), 1.27 (t, *J* = 7.1 Hz, 3H), 1.10 (t, *J* = 7.1 Hz, 3H);

<sup>13</sup>C NMR (DMSO) δ 14.52 (1C), 14.71 (1C), 63.01 (1C), 63.61 (1C), 67.49 (1C), 75.21 (1C), 99.93 (1C), 124.18 (1C), 126.69 (1C), 129.26 (1C), 129.37 (2C), 129.42 (2C), 131.12 (1C), 132.22 (1C), 134.34 (1C), 136.30 (1C), 137.00 (1C), 143.05 (1C), 146.33 (1C), 161.92 (1C), 165.38 (1C), 166.52 (1C), 169.52 (1C);

HRMS (ESI<sup>+</sup>) *m/z* 488.1326 (488.1321 calcd for C<sub>25</sub>H<sub>23</sub>NO<sub>8</sub>Na<sup>+</sup>, [M+Na]<sup>+</sup>).

#### 3,3-diethyl1-(4-methylbenzyl)9b-hydroxy-5-oxo-5,9b-dihydro-3H-pyrrolo[2,1-a]isoindole-1,3,3-tricarboxylate (**3b**)

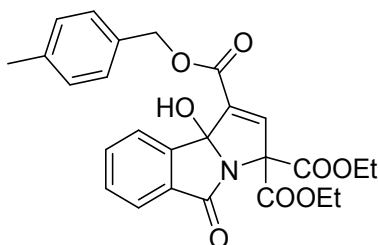

Yield: 39% (74.8 mg, 0.156 mmol);

White solid (mp 137-139 °C);

$^1\text{H}$  NMR (DMSO)  $\delta$  7.97 (dt,  $J = 7.7, 0.9$  Hz, 1H), 7.70 (td,  $J = 7.4, 6.0$  Hz, 2H), 7.61 (td,  $J = 7.5, 1.1$  Hz, 1H), 7.43 - 7.35 (m, 3H), 7.25 (d,  $J = 7.8$  Hz, 2H), 7.15 (s, 1H), 5.35 - 5.25 (m, 2H), 4.40 - 4.07 (m, 4H), 2.34 (s, 3H), 1.30 (t,  $J = 7.1$  Hz, 3H), 1.12 (t,  $J = 7.1$  Hz, 3H);

$^{13}\text{C}$  NMR (DMSO)  $\delta$  14.13 (1C), 14.32 (1C), 21.24 (1C), 62.60 (1C), 63.21 (1C), 67.04 (1C), 74.81 (1C), 99.53 (1C), 123.76 (1C), 126.31 (1C), 129.19 (2C), 129.56 (2C), 130.71 (1C), 131.84 (1C), 132.88 (1C), 133.92 (1C), 136.70 (1C), 138.30 (1C), 142.53 (1C), 145.95 (1C), 161.54 (1C), 164.98 (1C), 166.13 (1C), 169.11 (1C);

HRMS (ESI<sup>+</sup>)  $m/z$  502.1473 (502.1478 calcd for  $\text{C}_{26}\text{H}_{25}\text{NO}_8\text{Na}^+$ ,  $[\text{M}+\text{Na}]^+$ ).

**3,3-diethyl1-(4-methoxybenzyl)9b-hydroxy-5-oxo-5,9b-dihydro-3H-pyrrolo[2,1-a]isoindole-1,3,3-tricarboxylate (3c)**

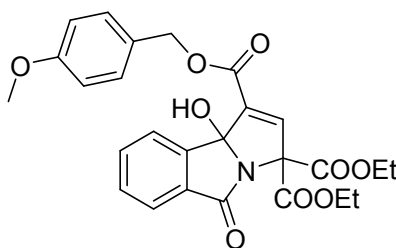

Yield: 24% (47.6 mg, 0.096 mmol);

White solid (mp 46-48 °C);

$^1\text{H}$  NMR (DMSO)  $\delta$  7.94 (dd,  $J = 7.4, 1.7$  Hz, 1H), 7.73 - 7.62 (m, 2H), 7.62 - 7.53 (m, 1H), 7.49 - 7.32 (m, 3H), 7.11 (s, 1H), 7.02 - 6.89 (m, 2H), 5.33 - 5.16 (m, 2H), 4.38 - 4.03 (m, 4H), 3.76 (s, 3H), 1.26 (t,  $J = 7.1$  Hz, 3H), 1.08 (t,  $J = 7.1$  Hz, 3H);

$^{13}\text{C}$  NMR (DMSO)  $\delta$  13.64 (1C), 13.82 (1C), 55.11 (1C), 62.11 (1C), 62.71 (1C), 66.48 (1C), 74.24 (1C), 98.99 (1C), 113.89 (2C), 123.26 (1C), 125.82 (1C), 127.24 (1C), 130.22 (1C), 130.57 (2C), 131.28 (1C), 133.43 (1C), 136.20 (1C), 141.97 (1C), 145.40 (1C), 159.41 (1C), 161.03 (1C), 164.47 (1C), 165.60 (1C), 168.59 (1C);

HRMS (ESI<sup>+</sup>)  $m/z$  518.1436 (518.1427 calcd for  $\text{C}_{26}\text{H}_{25}\text{NO}_9\text{Na}^+$ ,  $[\text{M}+\text{Na}]^+$ ).

**1-(4-bromobenzyl)3,3-diethyl9b-hydroxy-5-oxo-5,9b-dihydro-3H-pyrrolo[2,1-a]isoindole-1,3,3-tricarboxylate (3d)**

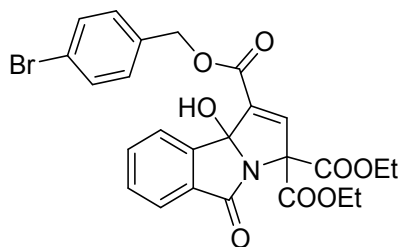

Yield: 60% (130.6 mg, 0.240 mmol);

White solid (mp 154-156 °C);

<sup>1</sup>H NMR (DMSO) δ 7.95 (d, *J* = 6.9 Hz, 1H), 7.75 - 7.54 (m, 5H), 7.52 - 7.38 (m, 3H), 7.19 (s, 1H), 5.30 (s, 2H), 4.40 - 4.01 (m, 4H), 1.26 (t, *J* = 7.1 Hz, 3H), 1.09 (t, *J* = 7.1 Hz, 3H);

<sup>13</sup>C NMR (DMSO) δ 13.64 (1C), 13.83 (1C), 62.13 (1C), 62.74 (1C), 65.81 (1C), 74.30 (1C), 99.00 (1C), 121.60 (1C), 123.30 (1C), 125.75 (1C), 130.26 (1C), 130.66 (1C), 131.27 (1C), 131.45 (1C), 133.48 (1C), 134.84 (1C), 135.92 (1C), 142.31 (1C), 145.38 (1C), 160.93 (1C), 164.45 (1C), 165.59 (1C), 168.62 (1C);

HRMS (ESI<sup>+</sup>) *m/z* 566.0438 (566.0426 calcd for C<sub>25</sub>H<sub>22</sub>NO<sub>8</sub>Na<sup>79</sup>Br<sup>+</sup>, [M+Na]<sup>+</sup>).

**1-(4-chlorobenzyl)3,3-diethyl9b-hydroxy-5-oxo-5,9b-dihydro-3H-pyrrolo[2,1-a]isoindole-1,3,3-tricarboxylate (3e)**

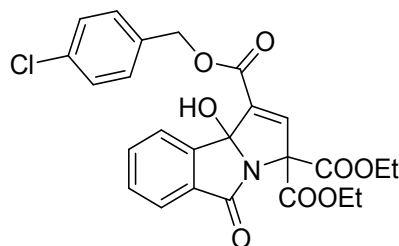

Yield: 47% (94.0 mg, 0.188 mmol);

White solid (mp 149-151 °C);

<sup>1</sup>H NMR (DMSO) δ 7.98 (d, *J* = 5.0 Hz, 1H), 7.74 - 7.67 (m, 2H), 7.62 (t, *J* = 7.5 Hz, 1H), 7.57 - 7.48 (m, 4H), 7.40 (d, *J* = 1.9 Hz, 1H), 7.20 (d, *J* = 1.7 Hz, 1H), 5.40 - 5.30 (m, 2H), 4.41 - 4.07 (m, 4H), 1.30 (td, *J* = 7.1, 1.2 Hz, 3H), 1.13 (td, *J* = 7.1, 1.2 Hz, 3H);

<sup>13</sup>C NMR (DMSO) δ 14.13 (1C), 14.32 (1C), 62.62 (1C), 63.23 (1C), 66.27 (1C), 74.85 (1C), 99.54 (1C), 123.79 (1C), 126.26 (1C), 129.03 (2C), 130.74 (1C), 130.85 (1C), 131.84 (1C), 133.56 (1C), 133.95 (1C), 134.96 (1C), 136.52 (1C), 142.78 (1C), 145.94 (1C), 161.47 (1C), 164.97 (1C), 166.12 (1C), 169.12 (1C);

HRMS (ESI<sup>+</sup>) *m/z* 522.0941 (522.0932 calcd for C<sub>25</sub>H<sub>22</sub>NO<sub>8</sub>NaCl<sup>+</sup>, [M+Na]<sup>+</sup>).

**3,3-diethyl1-(4-fluorobenzyl)9b-hydroxy-5-oxo-5,9b-dihydro-3H-pyrrolo[2,1-a]isoindole-1,3,3-tricarboxylate (3f)**

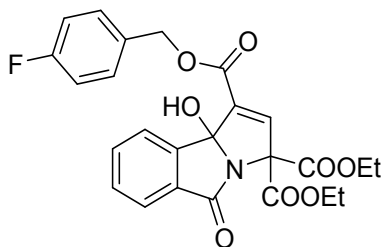

Yield: 40% (77.4 mg, 0.160 mmol);

White solid (mp 131-133 °C);

$^1\text{H}$  NMR (DMSO)  $\delta$  7.95 (d,  $J = 7.5$  Hz, 1H), 7.68 (t,  $J = 7.4$  Hz, 2H), 7.64 - 7.49 (m, 3H), 7.42 (s, 1H), 7.25 (dd,  $J = 8.7, 8.6$  Hz, 2H), 7.18 (s, 1H), 5.31 (s, 2H), 4.41 - 4.00 (m, 4H), 1.26 (t,  $J = 7.1$  Hz, 3H), 1.09 (t,  $J = 7.1$  Hz, 3H);

$^{13}\text{C}$  NMR (DMSO)  $\delta$  13.63 (1C), 13.82 (1C), 62.12 (1C), 62.73 (1C), 65.88 (1C), 74.29 (1C), 99.00 (1C), 115.51 (d,  $J_{\text{C-F}} = 21.7$  Hz, 2C), 123.29 (1C), 125.77 (1C), 130.25 (1C), 130.89 (d,  $J_{\text{C-F}} = 8.3$  Hz, 2C), 131.00 (1C), 131.28 (1C), 131.68 (d,  $J_{\text{C-F}} = 3.0$  Hz, 1C), 133.46 (1C), 136.01 (1C), 142.23 (1C), 145.39 (1C), 160.97 (1C), 163.66 (d,  $J_{\text{C-F}} = 243.0$  Hz, 1C), 164.46 (1C), 165.60 (1C), 168.61 (1C);

HRMS (ESI $^+$ )  $m/z$  506.1222 (506.1227 calcd for  $\text{C}_{25}\text{H}_{22}\text{NO}_8\text{FNa}^+$ ,  $[\text{M}+\text{Na}]^+$ ).

**3,3-diethyl-1-(4-(trifluoromethyl)benzyl)-9b-hydroxy-5-oxo-5,9b-dihydro-3H-pyrrolo[2,1-a]isoindole-1,3,3-tricarboxylate (3g)**

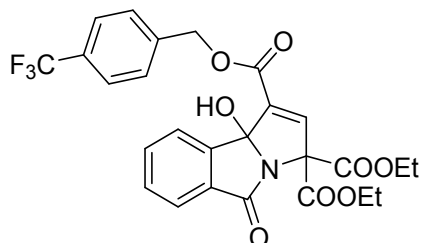

Yield: 70% (149.4 mg, 0.280 mmol);

White solid (mp 179-181 °C);

$^1\text{H}$  NMR (DMSO)  $\delta$  7.97 (d,  $J = 7.2$  Hz, 1H), 7.79 (d,  $J = 8.2$  Hz, 2H), 7.76 - 7.65 (m, 4H), 7.60 (ddd,  $J = 8.4, 6.4, 1.1$  Hz, 1H), 7.45 (s, 1H), 7.25 (s, 1H), 5.43 (s, 2H), 4.41 - 4.02 (m, 4H), 1.27 (t,  $J = 7.1$  Hz, 3H), 1.10 (t,  $J = 7.1$  Hz, 3H);

$^{13}\text{C}$  NMR (DMSO)  $\delta$  13.63 (1C), 13.82 (1C), 62.14 (1C), 62.74 (1C), 65.66 (1C), 74.35 (1C), 99.02 (1C), 123.31 (1C), 125.36 (2C), 125.42 (1C), 125.72 (1C), 128.80 (2C), 130.27 (1C), 131.29 (1C), 133.49 (1C), 135.82 (1C), 140.21 (1C), 142.48 (1C), 145.39 (1C), 160.90 (1C), 164.44 (1C), 165.60 (1C), 168.63 (1C);

HRMS (ESI $^+$ )  $m/z$  556.1201 (556.1195 calcd for  $\text{C}_{26}\text{H}_{22}\text{NO}_8\text{NaF}_3^+$ ,  $[\text{M}+\text{Na}]^+$ ).

**3,3-diethyl1-(4-nitrobenzyl)9b-hydroxy-5-oxo-5,9b-dihydro-3H-pyrrolo[2,1-a]isoindole-1,3,3-tricarboxylate (3h)**

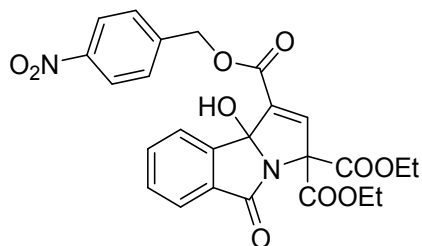

Yield: 45% (91.9 mg, 0.180 mmol);

White solid (mp 169-171 °C);

$^1\text{H}$  NMR (DMSO)  $\delta$  8.27 (d,  $J$  = 8.7 Hz, 2H), 7.97 (d,  $J$  = 8.1 Hz, 1H), 7.76 (d,  $J$  = 8.7 Hz, 2H), 7.70 (d,  $J$  = 6.9 Hz, 2H), 7.60 (t,  $J$  = 6.6 Hz, 1H), 7.46 (s, 1H), 7.28 (s, 1H), 5.48 (s, 2H), 4.37 - 4.07 (m, 4H), 1.27 (t,  $J$  = 7.1 Hz, 3H), 1.10 (t,  $J$  = 7.1 Hz, 3H);

$^{13}\text{C}$  NMR (DMSO)  $\delta$  13.65 (1C), 13.83 (1C), 62.16 (1C), 62.76 (1C), 65.33 (1C), 74.37 (1C), 99.02 (1C), 123.33 (1C), 123.62 (2C), 125.72 (1C), 129.01 (1C), 130.29 (1C), 131.26 (1C), 133.56 (1C), 135.72 (1C), 142.62 (1C), 143.11 (1C), 145.37 (1C), 147.25 (1C), 160.84 (1C), 164.44 (1C), 165.59 (1C), 168.63 (1C);

HRMS (ESI<sup>+</sup>)  $m/z$  533.1180 (533.1172 calcd for  $\text{C}_{25}\text{H}_{22}\text{N}_2\text{O}_{10}\text{Na}^+$ ,  $[\text{M}+\text{Na}]^+$ ).

**3,3-diethyl1-(naphthalen-2-ylmethyl)9b-hydroxy-5-oxo-5,9b-dihydro-3H-pyrrolo[2,1-a]isoindole-1,3,3-tricarboxylate (3i)**

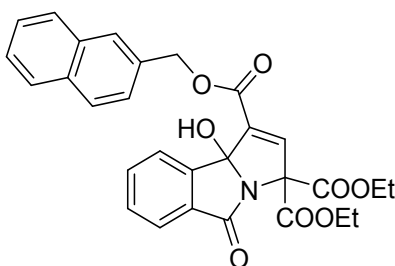

Yield: 54% (111.4 mg, 0.216 mmol);

White solid (mp 64-66 °C);

$^1\text{H}$  NMR (DMSO)  $\delta$  8.33 - 7.88 (m, 6H), 7.75 - 7.54 (m, 5H), 7.41 (s, 1H), 7.22 (s, 1H), 5.59 - 5.47 (m, 2H), 4.73 - 3.78 (m, 4H), 1.30 (t,  $J$  = 4.5 Hz, 3H), 1.11 (t,  $J$  = 4.6 Hz, 3H);

$^{13}\text{C}$  NMR (DMSO)  $\delta$  14.12 (1C), 14.32 (1C), 62.61 (1C), 63.21 (1C), 67.27 (1C), 74.85 (1C), 99.56 (1C), 123.78 (1C), 126.30 (1C), 126.76 (1C), 126.93 (2C), 128.04 (1C), 128.10 (1C), 128.34 (1C), 128.70 (1C), 130.72 (1C), 131.85 (1C), 133.18 (1C), 133.21 (1C), 133.45 (1C), 133.91 (1C), 136.64 (1C), 142.72 (1C), 145.95 (1C), 161.59 (1C), 164.98 (1C),



166.13 (1C), 169.12 (1C);

HRMS (ESI<sup>+</sup>)  $m/z$  538.1488 (538.1478 calcd for C<sub>29</sub>H<sub>25</sub>NO<sub>8</sub>Na<sup>+</sup>, [M+Na]<sup>+</sup>).

**3,3-diethyl1-(furan-2-ylmethyl)9b-hydroxy-5-oxo-5,9b-dihydro-3H-pyrrolo[2,1-*a*]isoindole-1,3,3-tricarboxylate**

**(3j)**

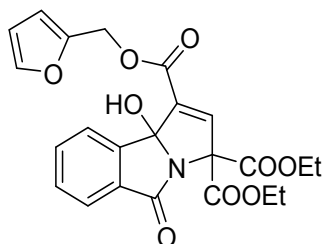

Yield: 55% (100.2 mg, 0.220 mmol);

White solid (mp 136-138 °C);

<sup>1</sup>H NMR (DMSO) δ 7.96 - 7.88 (m, 1H), 7.76 (dd,  $J = 1.9, 0.9$  Hz, 1H), 7.73 - 7.64 (m, 2H), 7.59 (ddd,  $J = 8.3, 6.5, 1.2$  Hz, 1H), 7.41 (s, 1H), 7.13 (s, 1H), 6.65 (dd,  $J = 3.2, 1.9$  Hz, 1H), 6.51 (dd,  $J = 3.2, 1.9$  Hz, 1H), 5.41-5.20 (m, 2H), 4.37 - 4.03 (m, 4H), 1.26 (t,  $J = 7.1$  Hz, 3H), 1.08 (t,  $J = 7.1$  Hz);

<sup>13</sup>C NMR (DMSO) δ 13.63 (1C), 13.82 (1C), 58.41 (1C), 62.13 (1C), 62.74 (1C), 74.27 (1C), 98.97 (1C), 110.85 (1C), 111.70 (1C), 123.29 (1C), 125.70 (1C), 130.24 (1C), 131.27 (1C), 133.46 (1C), 135.85 (1C), 142.32 (1C), 144.09 (1C), 145.34 (1C), 148.60 (1C), 160.72 (1C), 164.40 (1C), 165.55 (1C), 168.59 (1C);

HRMS (ESI<sup>+</sup>)  $m/z$  478.1121 (396.1059 calcd for C<sub>23</sub>H<sub>21</sub>NO<sub>9</sub>Na<sup>+</sup>, [M+Na]<sup>+</sup>).

**3,3-diethyl1-(thiophen-2-ylmethyl)9b-hydroxy-5-oxo-5,9b-dihydro-3H-pyrrolo[2,1-*a*]isoindole-1,3,3-tricarboxylate (3k)**

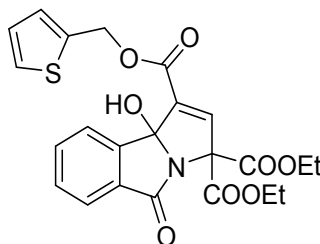

Yield: 39% (73.6 mg, 0.156 mmol);

White solid (mp 146-148 °C);

<sup>1</sup>H NMR (DMSO) δ 7.97 (d,  $J = 7.6$  Hz, 1H), 7.74 - 7.65 (m, 2H), 7.65 - 7.53 (m, 2H), 7.40 (s, 1H), 7.29 (d,  $J = 3.5, 1.1$  Hz, 1H), 7.12 (s, 1H), 7.06 (t,  $J = 4.4$  Hz, 1H), 5.60-5.40 (m, 2H), 4.37 - 4.03 (m, 4H), 1.26 (t,  $J = 7.0$  Hz, 3H), 1.08 (t,  $J =$

7.1 Hz);

$^{13}\text{C}$  NMR (DMSO)  $\delta$  13.64 (1C), 13.82 (1C), 60.86 (1C), 62.13 (1C), 62.74 (1C), 74.27 (1C), 98.96 (1C), 123.29 (1C), 125.76 (1C), 126.98 (1C), 128.05 (1C), 129.44 (1C), 130.25 (1C), 131.26 (1C), 133.48 (1C), 135.91 (1C), 136.96 (1C), 142.26 (1C), 145.35 (1C), 160.85 (1C), 164.42 (1C), 165.55 (1C), 168.59 (1C);

HRMS (ESI<sup>+</sup>)  $m/z$  494.0878 (494.0886 calcd for  $\text{C}_{23}\text{H}_{21}\text{NO}_8\text{NaS}^+$ ,  $[\text{M}+\text{Na}]^+$ ).

### 3,3-diethyl1-methyl9b-hydroxy-5-oxo-5,9b-dihydro-3H-pyrrolo[2,1-a]isoindole-1,3,3-tricarboxylate (3l)

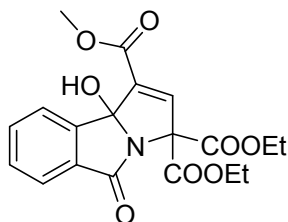

Yield: 53% (82.5 mg, 0.212 mmol);

White solid (mp 153-155 °C);

$^1\text{H}$  NMR (DMSO)  $\delta$  8.02 (d,  $J = 7.6$  Hz, 1H), 7.79 - 7.66 (m, 2H), 7.60 (t,  $J = 7.4$ , 1H), 7.39 (s, 1H), 7.13 (s, 1H), 4.40 - 4.02 (m, 4H), 3.82 (s, 1H), 1.27 (t,  $J = 7.1$  Hz, 3H), 1.08 (t,  $J = 7.1$  Hz, 3H);

$^{13}\text{C}$  NMR (DMSO)  $\delta$  13.63 (1C), 13.83 (1C), 52.23 (1C), 62.12 (1C), 62.70 (1C), 74.29 (1C), 99.00 (1C), 123.28 (1C), 125.72 (1C), 130.23 (1C), 131.27 (1C), 133.59 (1C), 135.95 (1C), 141.82 (1C), 145.48 (1C), 161.61 (1C), 164.48 (1C), 165.60 (1C), 168.65 (1C);

HRMS (ESI<sup>+</sup>)  $m/z$  412.1001 (412.1008 calcd for  $\text{C}_{19}\text{H}_{19}\text{NO}_8\text{Na}^+$ ,  $[\text{M}+\text{Na}]^+$ ).

### Triethyl 9b-hydroxy-5-oxo-5,9b-dihydro-3H-pyrrolo[2,1-a]isoindole-1,3,3-tricarboxylate (3m)

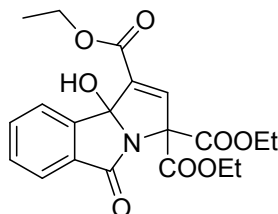

Yield: 50% (80.7 mg, 0.200 mmol);

White solid (mp 169-171 °C);

$^1\text{H}$  NMR (DMSO)  $\delta$  8.02 (d,  $J = 7.0$  Hz, 1H), 7.74 (ddd,  $J = 7.6, 7.4, 1.4$  Hz, 1H), 7.69 (d, 7.4Hz, 1H), 7.60 (dd, 7.5, 1.1 Hz, 1H), 7.38 (s, 1H), 7.10 (s, 1H), 4.40 - 4.01 (m, 6H), 1.31 (t,  $J = 7.1$  Hz, 3H), 1.27 (t,  $J = 7.1$  Hz, 3H), 1.10 (t,  $J$

= 7.1Hz, 3H);

<sup>13</sup>C NMR (DMSO) δ 14013 (1C), 14.32 (1C), 14.46 (1C), 61.69 (1C), 62.62 (1C), 63.22 (1C), 74.73 (1C), 99.50 (1C), 123.76 (1C), 126.28 (1C), 130.73 (1C), 131.79 (1C), 134.05 (1C), 136.79 (1C), 142.14 (1C), 146.00 (1C), 161.67 (1C), 165.05 (1C), 166.15 (1C), 169.15 (1C);

HRMS (ESI<sup>+</sup>) *m/z* 426.1169 (426.1165 calcd for C<sub>20</sub>H<sub>21</sub>NO<sub>8</sub>Na<sup>+</sup>, [M+Na]<sup>+</sup>).

**1-(tert-butyl)3,3-diethyl9b-hydroxy-5-oxo-5,9b-dihydro-3H-pyrrolo[2,1-*a*]isoindole-1,3,3-tricarboxylate (3n)**

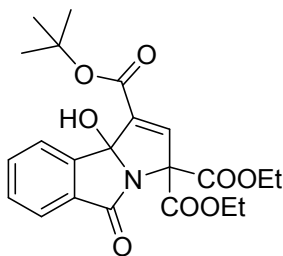

Yield: 16% (27.6 mg, 0.064 mmol);

White solid (mp 164-166 °C);

<sup>1</sup>H NMR (DMSO) δ 8.03 (d, *J* = 7.6 Hz, 1H), 7.75 (dd, *J* = 7.4, 7.5 Hz, 1H), 7.69 (d, *J* = 7.4 Hz, 1H), 7.60 (t, *J* = 7.4 Hz, 1H), 7.34 (s, 1H), 6.97 (s, 1H), 4.41 - 4.03 (m, 4H), 1.52 (s, 9H), 1.27 (t, *J* = 7.1 Hz, 3H), 1.11 (t, *J* = 7.1 Hz, 3H);

<sup>13</sup>C NMR (DMSO) δ 13.65 (1C), 13.82 (1C), 27.70 (3C), 62.09 (1C), 62.73 (1C), 74.04 (1C), 82.18 (1C), 98.93 (1C), 123.25 (1C), 125.77 (1C), 130.15 (1C), 131.30 (1C), 133.49 (1C), 137.65 (1C), 140.92 (1C), 145.61 (1C), 160.47 (1C), 164.69 (1C), 165.76 (1C), 168.59 (1C);

HRMS (ESI<sup>+</sup>) *m/z* 454.1465 (454.1478 calcd for C<sub>22</sub>H<sub>25</sub>NO<sub>8</sub>Na<sup>+</sup>, [M+Na]<sup>+</sup>).

**Diethyl1-acetyl9b-hydroxy-5-oxo-5,9b-dihydro-3H-pyrrolo[2,1-*a*]isoindole-3,3-dicarboxylate (3p)**

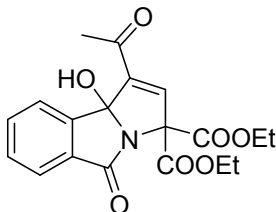

Yield: 87% (129.9 mg, 0.348 mmol);

White solid (mp 153-155 °C);

<sup>1</sup>H NMR (DMSO) δ 8.05 (d, *J* = 7.6 Hz, 1H), 7.77 - 7.62 (m, 2H), 7.57 (t, *J* = 7.4 Hz, 1H), 7.44 (s, 1H), 7.14 (s, 1H), 4.44 - 4.03 (m, 4H), 2.42 (s, 3H), 1.29 (t, *J* = 7.0 Hz, 3H), 1.12 (t, *J* = 7.1 Hz, 3H);

<sup>13</sup>C NMR (DMSO) δ 14.55 (1C), 14.75 (1C), 28.67 (1C), 62.95 (1C), 63.53 (1C), 75.30 (1C), 100.52 (1C), 123.99 (1C), 127.21 (1C), 130.87 (1C), 132.32 (1C), 134.29 (1C), 143.59 (1C), 143.78 (1C), 146.80 (1C), 165.66 (1C), 166.73 (1C), 169.51 (1C), 194.75 (1C);

HRMS (ESI<sup>+</sup>) *m/z* 396.1049 (396.1059 calcd for C<sub>19</sub>H<sub>19</sub>NO<sub>7</sub>Na<sup>+</sup>, [M+Na]<sup>+</sup>).

**Diethyl1-hexanoyl9b-hydroxy-5-oxo-5,9b-dihydro-3H-pyrrolo[2,1-*a*]isoindole-3,3-dicarboxylate (3q)**

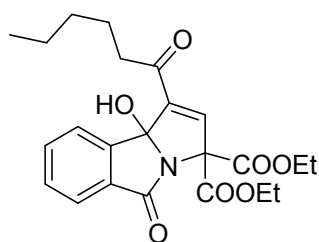

Yield: 48% (82.5 mg, 0.192 mmol);

White solid (mp 157-159 °C);

<sup>1</sup>H NMR (DMSO) δ 8.05 (d, *J* = 7.7 Hz, 1H), 7.77 - 7.63 (m, 2H), 7.56 (t, *J* = 7.4 Hz, 1H), 7.44 (s, 1H), 7.15 (s, 1H), 4.41 - 4.22 (m, 2H), 4.20 - 4.06 (m, 2H), 2.80 (td, *J* = 7.3, 2.3 Hz, 2H), 1.59 - 1.46 (m, 2H), 1.35 - 1.19 (m, 7H), 1.10 (t, *J* = 7.1 Hz, 3H), 0.82 (t, *J* = 6.8 Hz, 3H);

<sup>13</sup>C NMR (DMSO) δ 13.65 (1C), 13.74 (1C), 13.87 (1C), 21.84 (1C), 23.39 (1C), 30.53 (1C), 62.02 (1C), 62.58 (1C), 74.38 (1C), 99.76 (1C), 123.08 (1C), 126.30 (1C), 129.96 (1C), 131.37 (1C), 133.39 (1C), 141.85 (1C), 142.14 (1C), 145.90 (1C), 164.78 (1C), 165.84 (1C), 168.61 (1C), 196.48 (1C);

HRMS (ESI<sup>+</sup>) *m/z* 452.1689 (452.1685 calcd for C<sub>23</sub>H<sub>27</sub>NO<sub>7</sub>Na<sup>+</sup>, [M+Na]<sup>+</sup>).

**Diethyl1-(cyclohexanecarbonyl)-9b-hydroxy-5-oxo-5,9b-dihydro-3H-pyrrolo[2,1-*a*]isoindole-3,3-dicarboxylate (3r)**

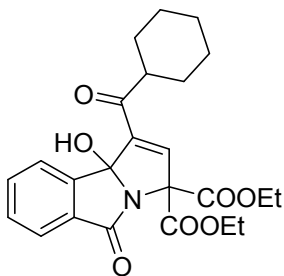

Yield: 53% (93.6 mg, 0.212 mmol);

White solid (mp 171-173 °C);

$^1\text{H}$  NMR (DMSO)  $\delta$  8.02 (d,  $J$  = 7.6 Hz, 1H), 7.76 - 7.62 (m, 2H), 7.56 (t,  $J$  = 7.4 Hz, 1H), 7.48 (s, 1H), 7.15 (s, 1H), 4.42 - 4.19 (m, 2H), 4.19 - 4.06 (m, 2H), 3.26 - 3.06 (m, 1H), 1.84 - 1.67 (m, 2H), 1.65 - 1.58 (m, 2H), 1.42 - 1.22 (m, 6H), 1.19 - 0.92 (m, 6H);

$^{13}\text{C}$  NMR (DMSO)  $\delta$  13.65 (1C), 13.88 (1C), 24.74 (1C), 24.82 (1C), 25.42 (1C), 28.51 (1C), 29.13 (1C), 46.22 (1C), 61.99 (1C), 62.55 (1C), 74.35 (1C), 99.86 (1C), 123.09 (1C), 126.22 (1C), 129.95 (1C), 131.39 (1C), 133.40 (1C), 140.91 (1C), 141.59 (1C), 145.91 (1C), 164.81 (1C), 165.89 (1C), 168.56 (1C), 199.57 (1C);

HRMS (ESI<sup>+</sup>)  $m/z$  464.1677 (464.1685 calcd for  $\text{C}_{24}\text{H}_{27}\text{NO}_7\text{Na}^+$ ,  $[\text{M}+\text{Na}]^+$ ).

**Diethyl9b-hydroxy-5-oxo-1-(3-phenylpropanoyl)-5,9b-dihydro-3H-pyrrolo[2,1-*a*]isoindole-3,3-dicarboxylate (3s)**

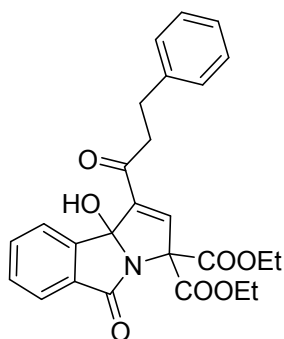

Yield: 62% (114.9 mg, 0.248 mmol);

White solid (mp 163-165 °C);

$^1\text{H}$  NMR (DMSO)  $\delta$  8.04 (d,  $J$  = 7.6 Hz, 1H), 7.77 - 7.62 (m, 2H), 7.57 (t,  $J$  = 7.4 Hz, 1H), 7.51 (s, 1H), 7.29 - 7.20 (m, 4H), 7.20 - 7.03 (m, 2H), 4.37 - 4.05 (m, 4H), 3.24 - 3.05 (m, 2H), 2.85 (t,  $J$  = 7.6 Hz), 1.27 (t,  $J$  = 7.0 Hz, 3H), 1.09 (t,  $J$  = 7.1 Hz);

$^{13}\text{C}$  NMR (DMSO)  $\delta$  13.67 (1C), 13.86 (1C), 29.21 (1C), 40.92 (1C), 62.01 (1C), 62.58 (1C), 74.44 (1C), 99.79 (1C), 123.08 (1C), 125.84 (1C), 126.31 (1C), 128.14 (2C), 128.36 (2C), 129.96 (1C), 131.38 (1C), 133.39 (1C), 140.70 (1C),

141.96 (1C), 142.17 (1C), 145.85 (1C), 164.75 (1C), 165.81 (1C), 168.60 (1C), 195.37 (1C);

HRMS (ESI<sup>+</sup>) *m/z* 486.1533 (486.1529 calcd for C<sub>26</sub>H<sub>25</sub>NO<sub>7</sub>Na<sup>+</sup>, [M+Na]<sup>+</sup>).

**1-benzyl3,3-dimethyl9b-hydroxy-5-oxo-5,9b-dihydro-3H-pyrrolo[2,1-*a*]isoindole-1,3,3-tricarboxylate (3u)**

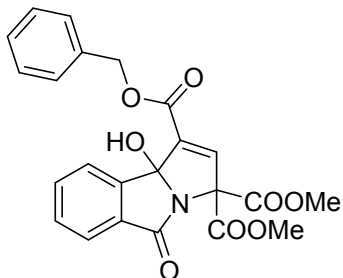

Yield: 40% (70.0 mg, 0.160 mmol);

White solid (mp 96-98 °C);

<sup>1</sup>H NMR (DMSO) δ 7.95 (d, *J* = 7.5 Hz, 2H), 7.75 - 7.55 (m, 3H), 7.49 - 7.34 (m, 5H), 7.22 (s, 1H), 5.2 - 5.43 (m, 2H), 3.80 (s, 3H), 3.64 (s, 1H);

<sup>13</sup>C NMR (DMSO) δ 53.29 (1C), 53.51 (1C), 66.62 (1C), 74.08 (1C), 99.02 (1C), 123.42 (1C), 125.82 (1C), 128.38 (1C), 128.53 (2C), 128.55 (2C), 130.28 (1C), 131.14 (1C), 133.54 (1C), 135.36 (1C), 136.11 (1C), 142.12 (1C), 145.37 (1C), 160.96 (2C), 165.00 (1C), 166.18 (1C).

HRMS (ESI<sup>+</sup>) *m/z* 460.1003 (460.1008 calcd for C<sub>23</sub>H<sub>19</sub>NO<sub>8</sub>Na<sup>+</sup>, [M+Na]<sup>+</sup>).

**1-benzyl3,3-dipropyl9b-hydroxy-5-oxo-5,9b-dihydro-3H-pyrrolo[2,1-*a*]isoindole-1,3,3-tricarboxylate (3v)**

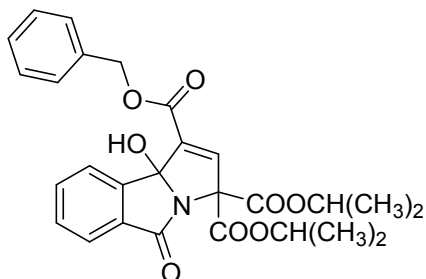

Yield: 48% (94.8 mg, 0.192 mmol);

White solid (mp 164-166 °C);

<sup>1</sup>H NMR (DMSO) δ 7.93 (d, *J* = 7.4 Hz, 1H), 7.72 - 7.54 (m, 3H), 7.52 - 7.32 (m, 6H), 7.10 (s, 1H), 5.33 (s, 2H), 5.10 - 4.99 (m, 1H), 4.99 - 4.88 (m, 1H), 1.27 (d, *J* = 6.3 Hz, 6H), 1.18 (d, *J* = 6.2 Hz, 3H), 1.11 (d, *J* = 6.2 Hz);

<sup>13</sup>C NMR (DMSO) δ 21.15 (1C), 21.17 (1C), 21.19 (1C), 21.35 (1C), 66.53 (1C), 69.94 (1C), 71.01 (1C), 74.47 (1C), 98.98 (1C), 123.22 (1C), 125.74 (1C), 128.34 (1C), 128.38 (1C), 128.42 (1C), 128.51 (2C), 130.18 (1C), 131.39 (1C),

133.36 (1C), 135.44 (1C), 135.99 (1C), 142.35 (1C), 145.40 (1C), 161.04 (1C), 164.01 (1C), 165.09 (1C), 168.55 (1C)

HRMS (ESI<sup>+</sup>) *m/z* 516.1650 (516.1634 calcd for C<sub>27</sub>H<sub>27</sub>NO<sub>8</sub>Na<sup>+</sup>, [M+Na]<sup>+</sup>).

#### Diethyl5-(2-(ethoxycarbonyl)phenyl)-1H-pyrrole-2,4-dicarboxylate (4)

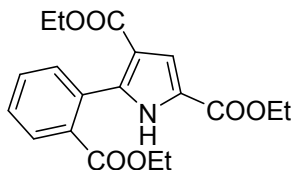

To a solution of **3m** (81.0mg, 0.2mmol) in EtOH (5.0mL), NaOH (48.0mg, 1.2mmol) was added at room temperature. After stirring for 12h, the reaction mixture was concentrated and purified by column chromatography on silica gel (50% EA/PE) to afford **4**.

Yield: 89% (127.9 mg, 0.356 mmol);

White solid (mp 103-105 °C);

<sup>1</sup>H NMR (DMSO) δ 12.61 (s, 1H), 7.93 (dd, *J* = 7.7, 1.7 Hz, 1H), 7.68 - 7.51 (m, 2H), 7.41 (dd, *J* = 7.4, 1.6 Hz, 1H), 7.14 (s, 1H), 4.26 (q, *J* = 7.0 Hz, 2H), 4.03 (q, *J* = 7.1 Hz, 2H), 3.96 (q, *J* = 7.1 Hz, 2H), 1.30 (t, *J* = 7.1 Hz, 3H), 1.02 (t, *J* = 7.2 Hz, 6H);

<sup>13</sup>C NMR (DMSO) δ 13.58 (1C), 13.75 (1C), 14.24 (1C), 59.06 (1C), 59.92 (1C), 60.27 (1C), 113.75 (1C), 116.30 (1C), 121.77 (1C), 128.72 (1C), 129.31 (1C), 131.19 (1C), 131.35 (1C), 131.91 (1C), 132.03 (1C), 140.33 (1C), 159.99 (1C), 163.01 (1C), 165.97 (1C);

HRMS (ESI<sup>+</sup>) *m/z* 382.0915 (382.1267 calcd for C<sub>19</sub>H<sub>21</sub>NO<sub>6</sub>Na<sup>+</sup>, [M+Na]<sup>+</sup>).

#### Triethyl9b-hydroxy-5-oxo-1,2,5,9b-tetrahydro-3H-pyrrolo[2,1-*a*]isoindole-1,3,3-tricarboxylate (5)

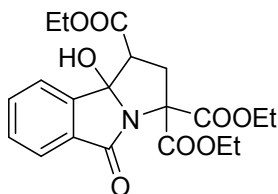

To a solution of **3m** (81.0 mg, 0.2 mmol) in MeOH (5.0 mL), Pd/C (8.1 mg) was added. The mixture was stirred at room temperature under H<sub>2</sub> atmosphere until TLC analysis showed a complete consumption of the starting material. The reaction mixture was filtered and concentrated in vacuo. The crude product was purified by column chromatography on silica gel (20% EA/PE) to afford **5**.

Yield: 74% (120.0 mg, 0.296 mmol);

White solid (mp 145-147 °C);

<sup>1</sup>H NMR (DMSO) δ 7.86 - 7.68 (m, 2H), 7.68 - 7.51 (m, 2H), 7.16 (d, *J* = 1.7 Hz, 1H), 4.37 - 4.17 (m, 4H), 4.17 - 4.02 (m, 2H), 3.37 (dd, *J* = 13.4, 12.2 Hz, 2H), 3.13 (ddd, *J* = 12.2, 7.1, 1.8 Hz, 1H), 2.84 (dd, *J* = 13.4, 7.2 Hz, 1H), 1.32 (t, *J* = 7.1 Hz, 6H), 1.26 (t, *J* = 7.1 Hz, 3H), 1.10 (t, *J* = 7.1 Hz, 3H);

<sup>13</sup>C NMR (DMSO) δ 14.53 (1C), 14.77 (1C), 14.94 (1C), 50.64 (1C), 61.59(1C), 62.44 (1C), 62.80 (1C), 67.71 (1C), 96.38 (1C), 115.00 (1C), 123.80 (1C), 125.47 (1C), 130.96 (1C), 132.17 (1C), 133.96 (1C), 146.57 (1C), 167.33 (1C), 168.74 (1C), 168.89 (1C), 169.20 (1C);

HRMS (ESI<sup>+</sup>) *m/z* 428.1309 (428.1321 calcd for C<sub>20</sub>H<sub>23</sub>NO<sub>8</sub>Na<sup>+</sup>, [M+Na]<sup>+</sup>).

#### Tetraethyl5-oxo-2,5-dihydro-3H-pyrrolo[2,1-a]isoindole-1,2,3,3-tetracarboxylate (**6**)

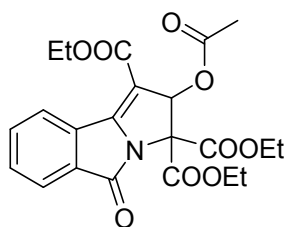

To a solution of **3m** (81.0 mg, 0.2 mmol) in CH<sub>2</sub>Cl<sub>2</sub> (10.0 mL), Et<sub>3</sub>N (67.1 mg, 0.6 mmol), Acetyl chloride (23.6 mg, 0.3 mmol) were added at room temperature. The mixture was stirred at room temperature until TLC analysis showed a complete consumption of the starting material. The reaction mixture was filtered and concentrated in vacuo. The crude product was purified by column chromatography on silica gel (10% EA/PE) to afford **6**.

Yield: 91% (167.2 mg, 0.364 mmol);

White solid (mp 113-117 °C);

<sup>1</sup>H NMR (DMSO) δ 8.59 (d, *J* = 7.38 Hz, 1H), 7.99 - 7.85 (m, 3H), 7.15 (s, 1H), 4.59 - 3.97 (m, 8H), 2.06 (s, 3H), 1.51 - 0.87 (m, 12H);

<sup>13</sup>C NMR (DMSO) δ 13.64 (1C), 13.79 (1C), 13.94 (1C), 20.22 (1C), 60.74 (1C), 62.88 (1C), 63.02 (1C), 72.31 (1C), 79.98 (1C), 104.80 (1C), 124.17 (1C), 127.21 (1C), 128.28 (1C), 133.55 (1C), 133.81 (1C), 134.33 (1C), 151.26 (1C), 160.91 (1C), 162.05 (1C), 164.10 (1C), 167.86 (1C);

HRMS (ESI<sup>+</sup>) *m/z* 468.1262 (468.1271 calcd for C<sub>22</sub>H<sub>23</sub>NO<sub>9</sub>Na<sup>+</sup>, [M+Na]<sup>+</sup>).

#### Gram-scale preparation of Triethyl 9b-hydroxy-5-oxo-5,9b-dihydro-3H-pyrrolo[2,1-a]isoindole-1,3,3-tricarboxylate (**3m**)

To a mixture of phthalimidomalonate derivative **1** (1.22 g, 4 mmol) and electron - deficient alkyne **2a** (0.78 g, 8



mmol) in CH<sub>3</sub>CN (50 mL) Et<sub>3</sub>N (0.08 g, 0.8 mol) was added. The resulting solution was stirred at 0 °C for 100 h. After removal of solvent, the residue was column chromatographed on silica and eluted with PE/EA (5:1) to afford **3m**. Yield: 47% (0.76 g, 1.88 mmol ).

#### IV.X-Ray crystallographic analysis of 3m

Crystallographic data for **3m** have been deposited with the Cambridge Crystallographic Data Centre as supplementary publication no. CCDC 1493448. These data can be obtained free of charge from The Cambridge Crystallographic Data Centre via [www.ccdc.cam.ac.uk/data\\_request/cif](http://www.ccdc.cam.ac.uk/data_request/cif).

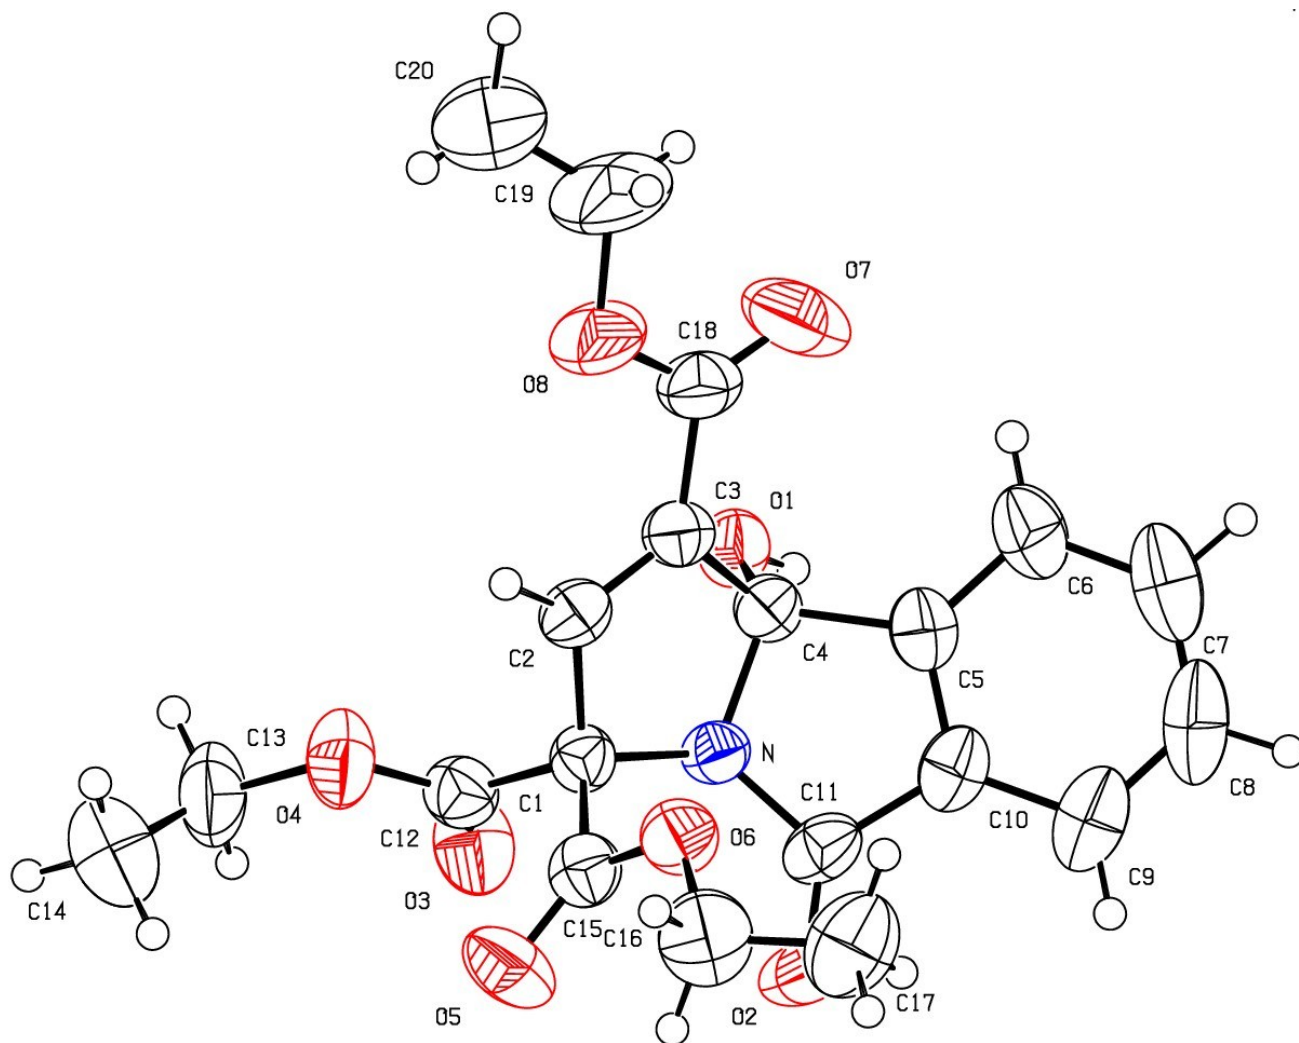

**Table S1** Crystal data and structure refinement for **3**

|                             |                                     |
|-----------------------------|-------------------------------------|
| Chemical formula            | $C_{20}H_{21}NO_8$                  |
| $M_r$                       | 403.38                              |
| Crystal system, space group | Monoclinic, $P2_1/C$                |
| Temperature (K)             | 293                                 |
| $a, b, c$ (Å)               | 8.1010 (16), 19.041 (4), 13.693 (3) |
| $\beta$ (°)                 | 107.19 (3)                          |
| $V$ (Å <sup>3</sup> )       | 2017.8 (7)                          |
| $Z$                         | 4                                   |

|                                                                            |                               |
|----------------------------------------------------------------------------|-------------------------------|
| Radiation type                                                             | Mo $K\alpha$                  |
| $\mu$ (mm <sup>-1</sup> )                                                  | 0.10                          |
| Crystal size (mm)                                                          | 0.30 × 0.20 × 0.10            |
| Data collection                                                            |                               |
| Diffractometer                                                             | Nonius CAD4 diffractometer    |
| Absorption correction                                                      | $\psi$ scan                   |
| $T_{\min}$ , $T_{\max}$                                                    | 0.970, 0.990                  |
| No. of measured, independent and observed [ $I > 2\sigma(I)$ ] reflections | 7831, 3714, 1841              |
| $R_{\text{int}}$                                                           | 0.135                         |
| $(\sin \theta/\lambda)_{\text{max}}$ (Å <sup>-1</sup> )                    | 0.604                         |
| Refinement                                                                 |                               |
| $R[F^2 > 2\sigma(F^2)]$ , $wR(F^2)$ , $S$                                  | 0.068, 0.181, 1.01            |
| No. of reflections                                                         | 3714                          |
| No. of parameters                                                          | 262                           |
| No. of restraints                                                          | 1                             |
| H-atom treatment                                                           | H-atom parameters constrained |
| $\Delta\rho_{\text{max}}$ , $\Delta\rho_{\text{min}}$ (e Å <sup>-3</sup> ) | 0.35, -0.35                   |

$^1\text{H}$  NMR (300 MHz) and  $^{13}\text{C}$  NMR (300 MHz) spectra of **3a** (DMSO)

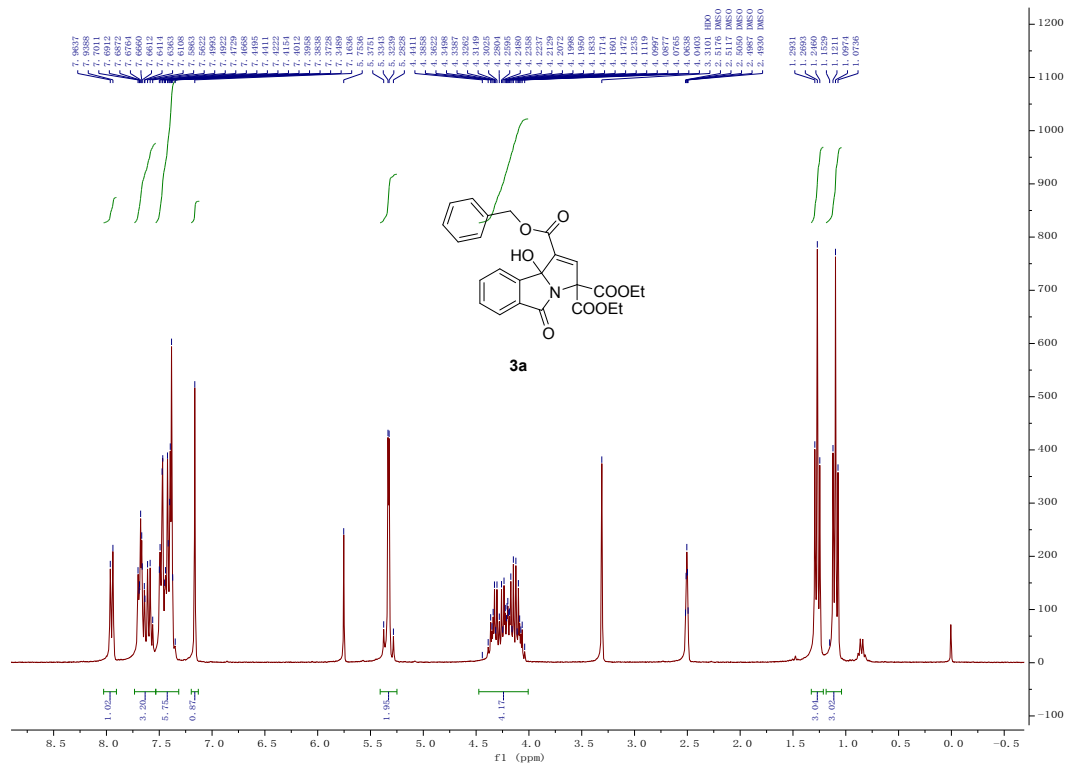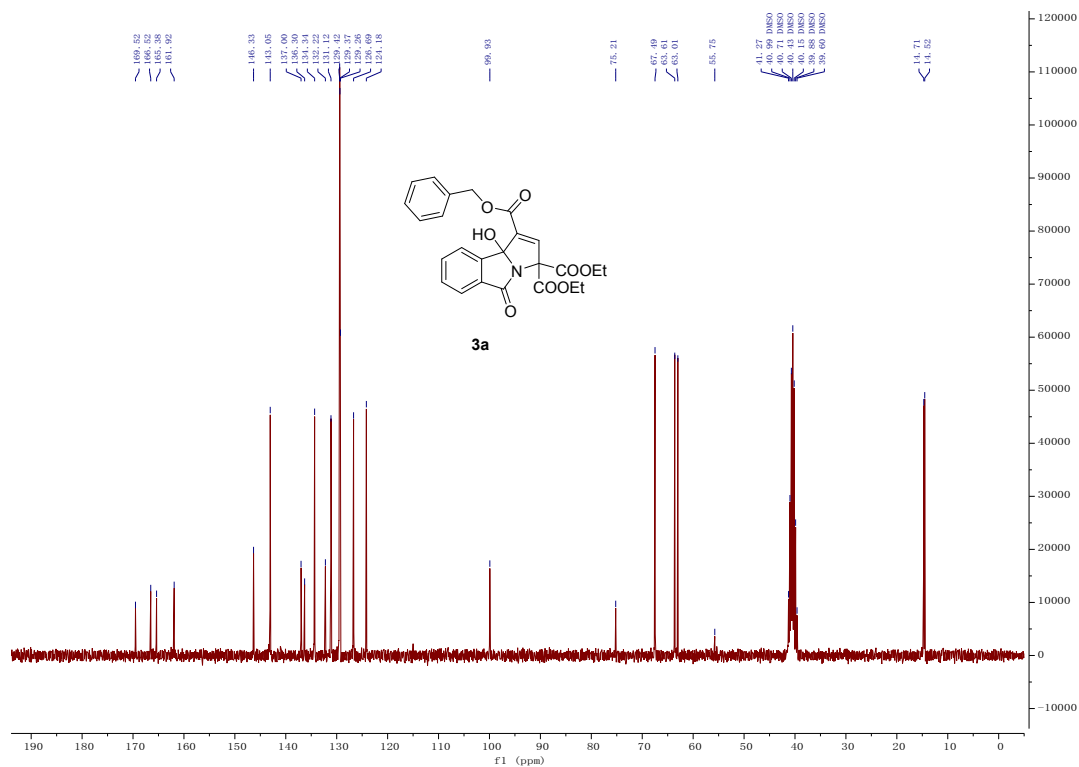

$^1\text{H}$  NMR (300 MHz) and  $^{13}\text{C}$  NMR (300 MHz) spectra of **3b** (DMSO)

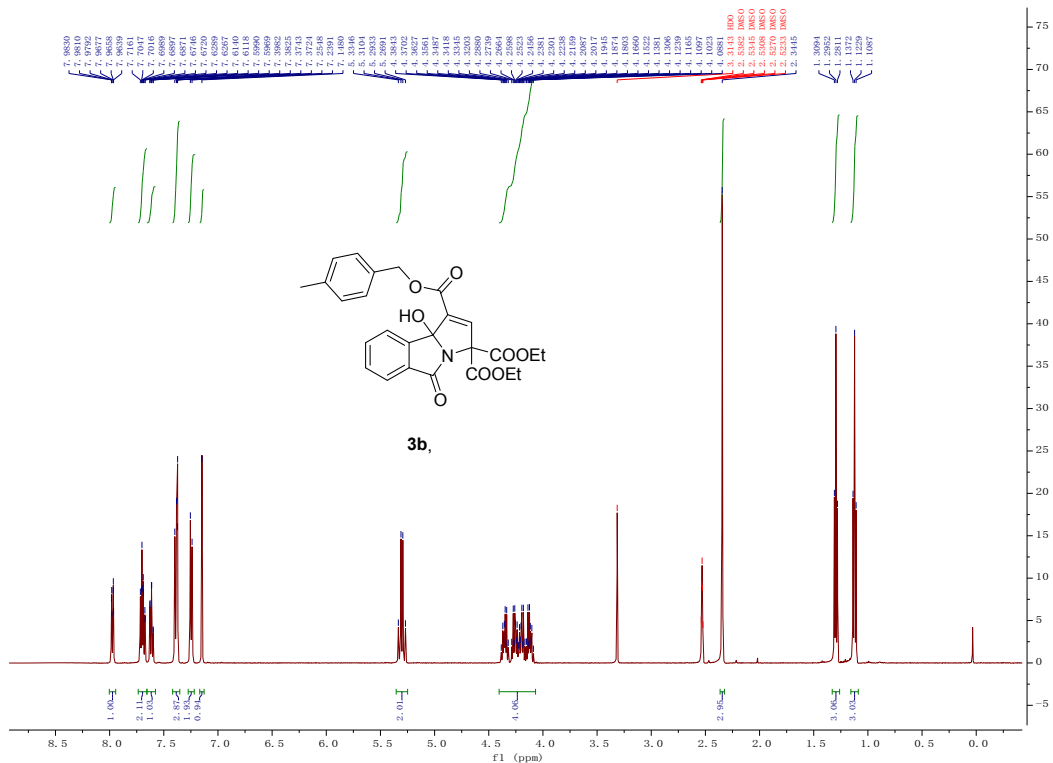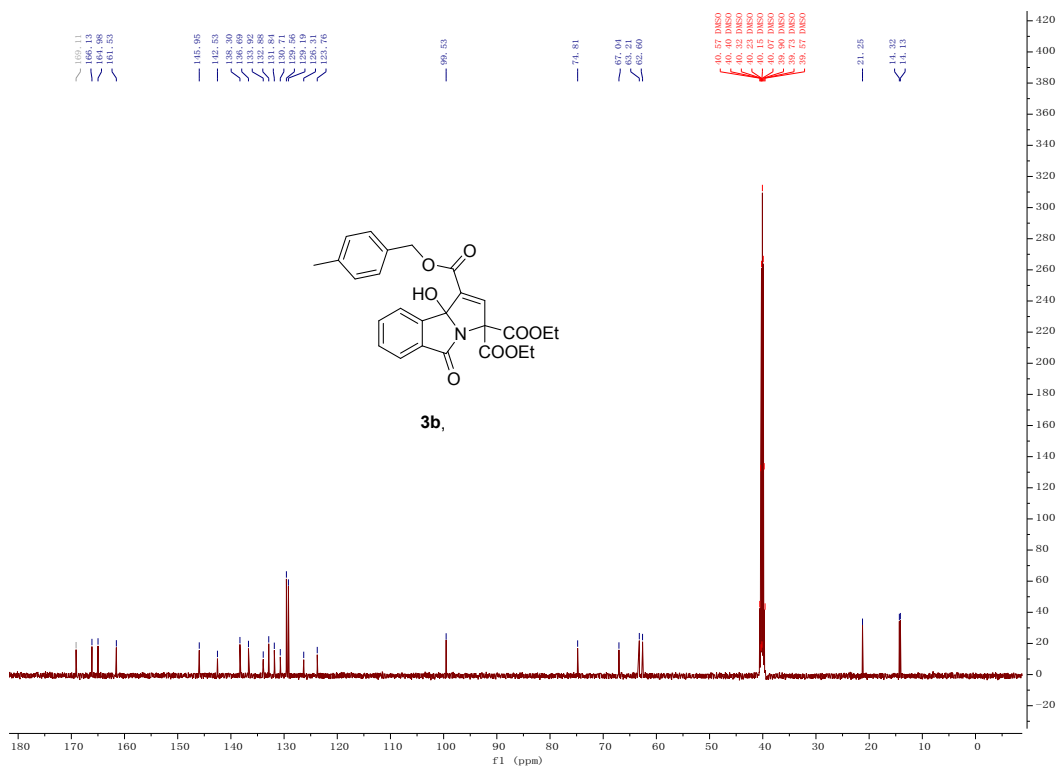

$^1\text{H}$  NMR (300 MHz) and  $^{13}\text{C}$  NMR (300 MHz) spectra of **3c** (DMSO)

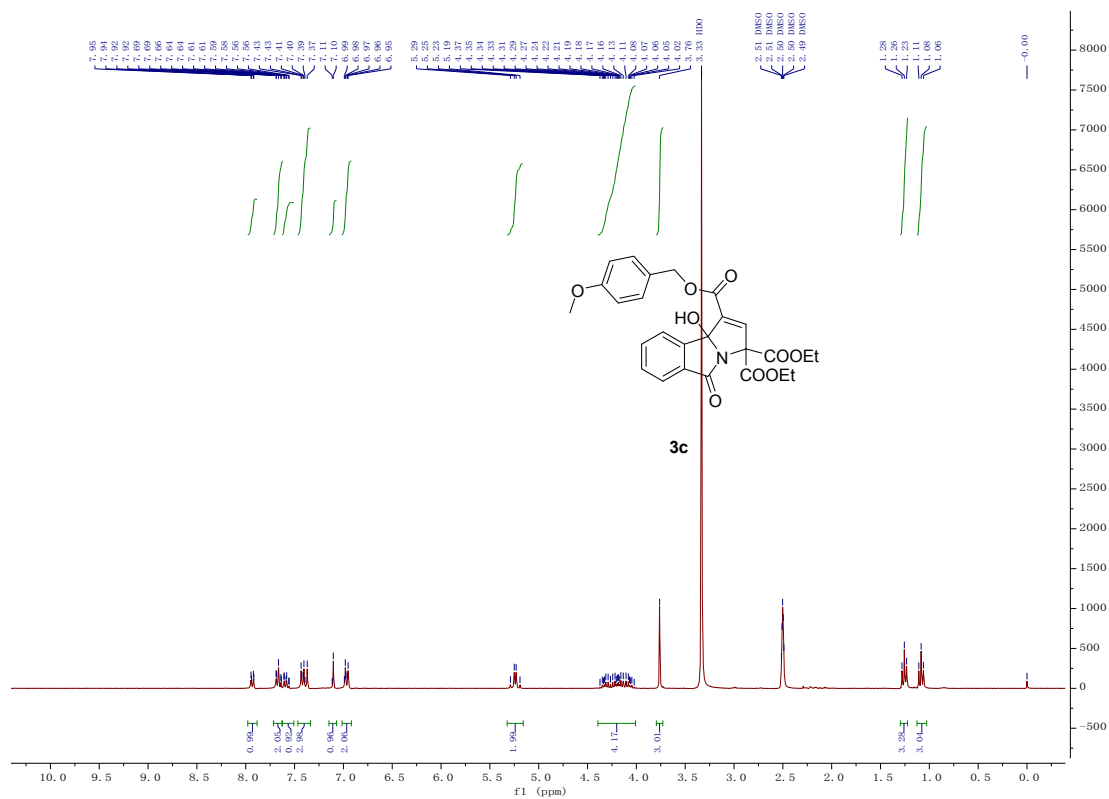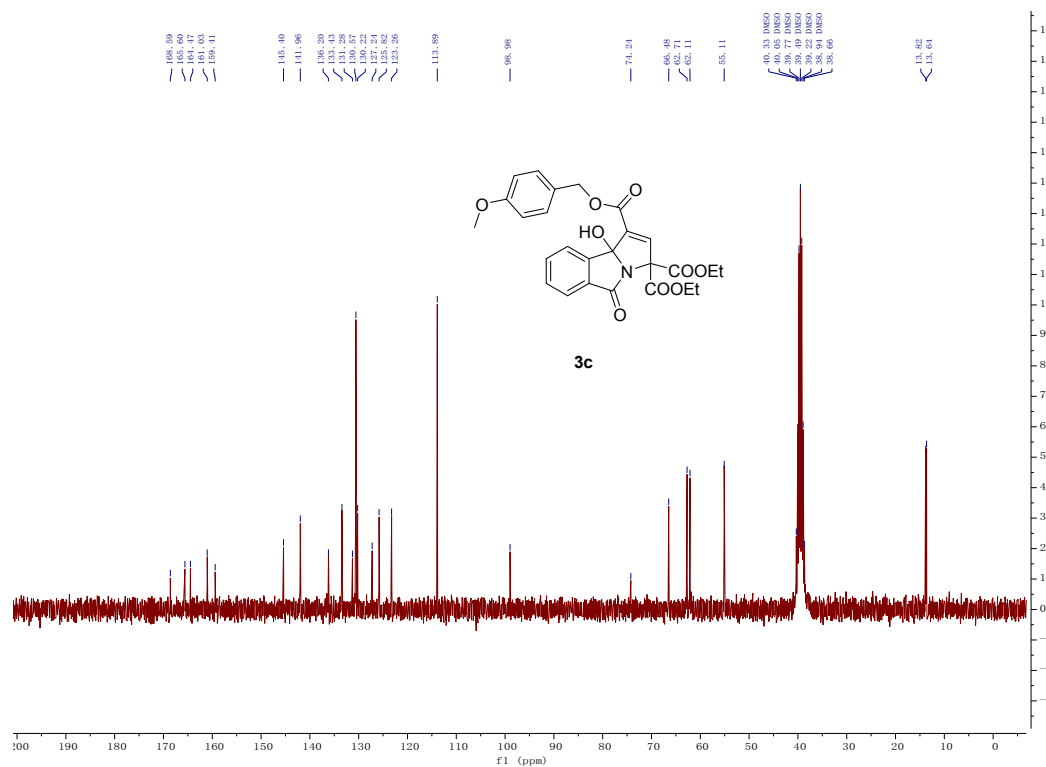

$^1\text{H}$  NMR (300 MHz) and  $^{13}\text{C}$  NMR (300 MHz) spectra of **3d** (DMSO)

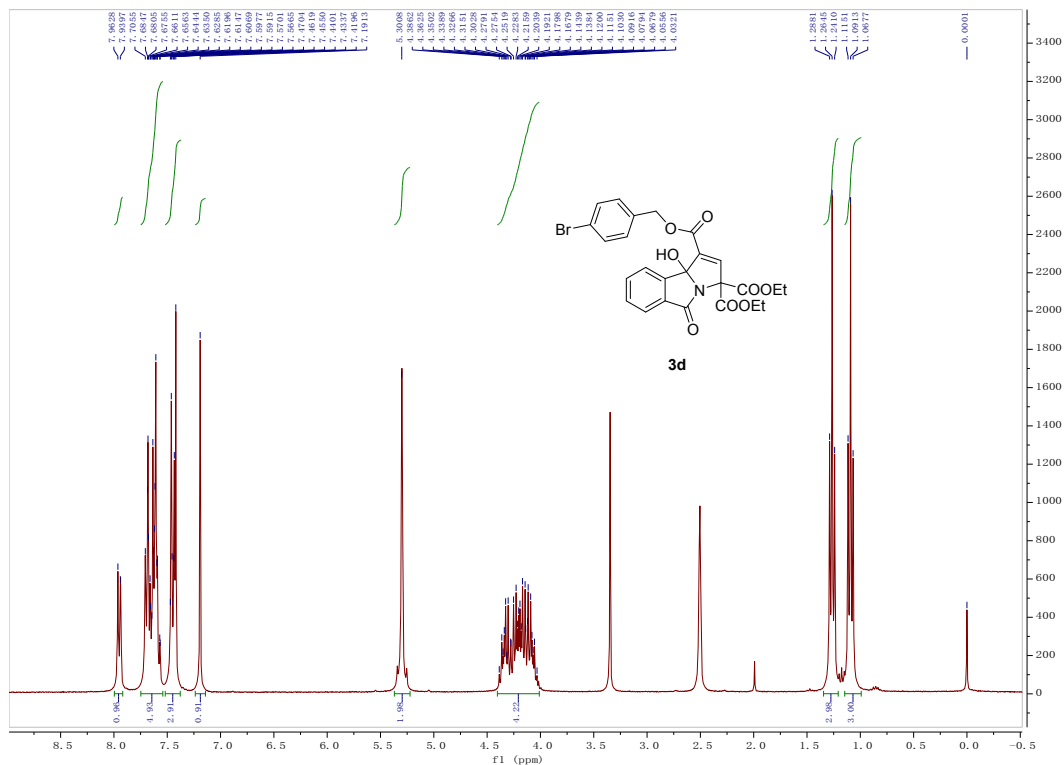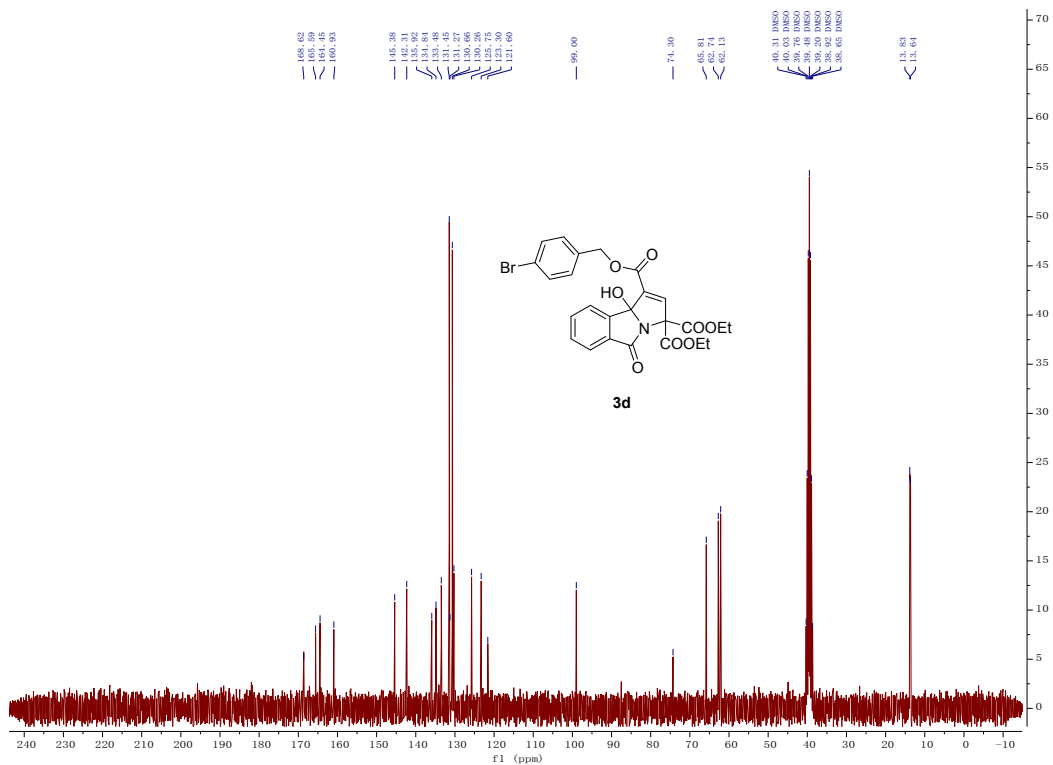

$^1\text{H}$  NMR (300 MHz) and  $^{13}\text{C}$  NMR (300 MHz) spectra of **3e** (DMSO)

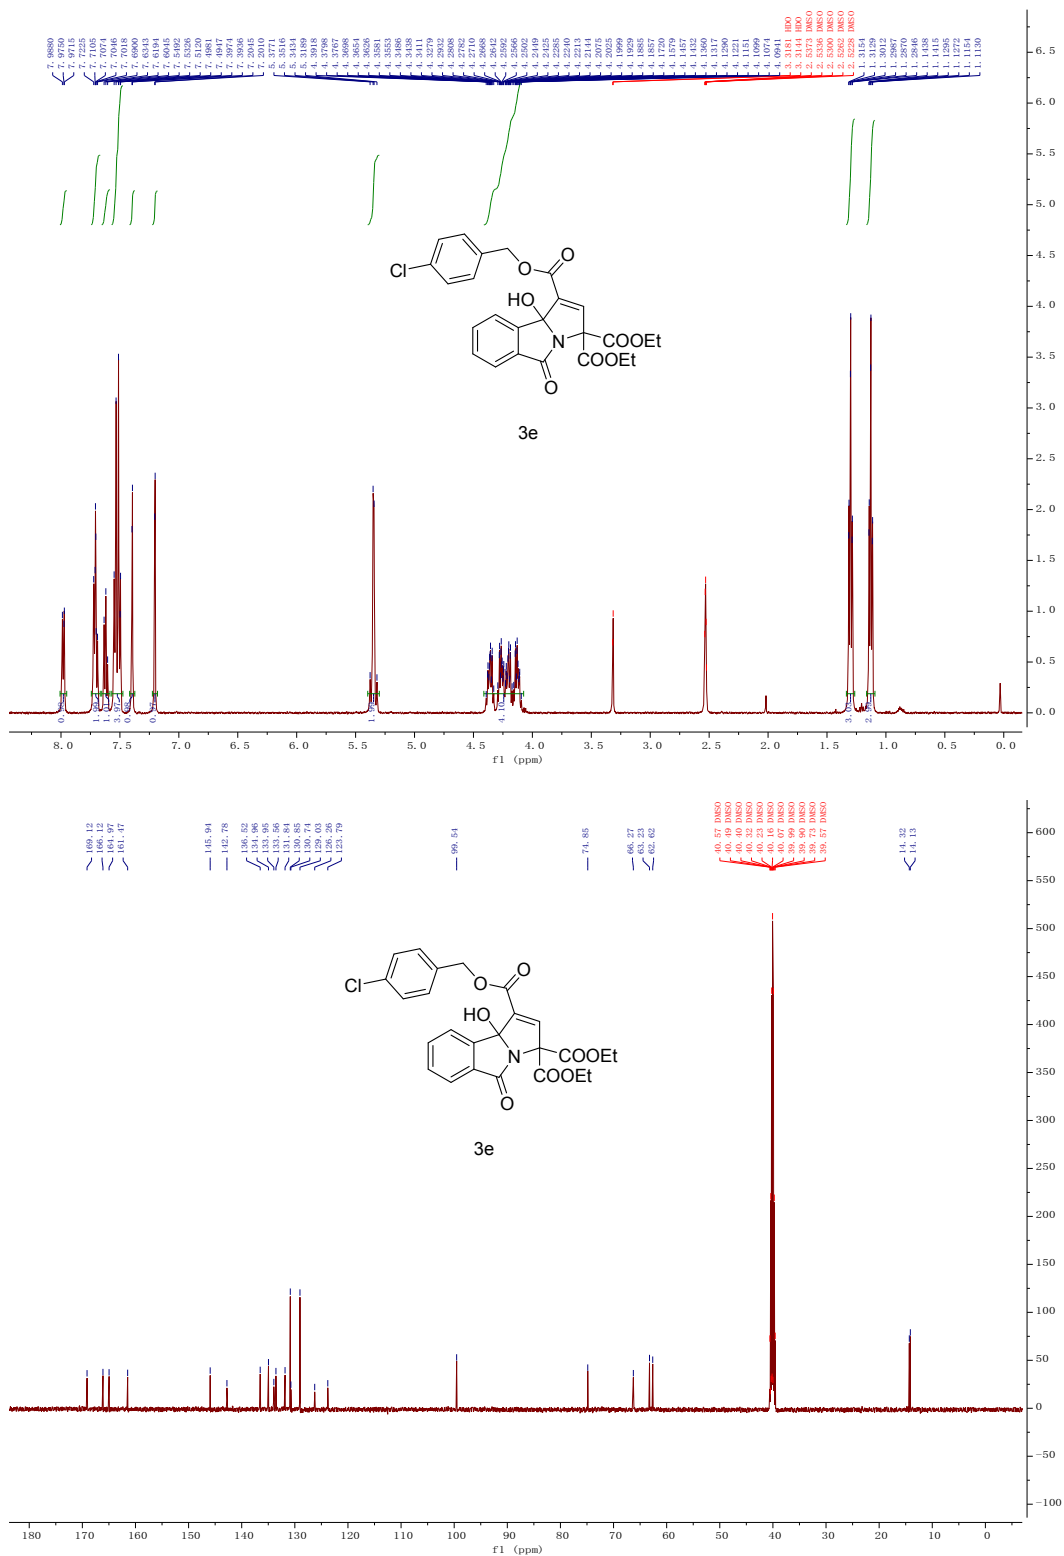



$^1\text{H}$  NMR (300 MHz) and  $^{13}\text{C}$  NMR (300 MHz) spectra of **3f** (DMSO)

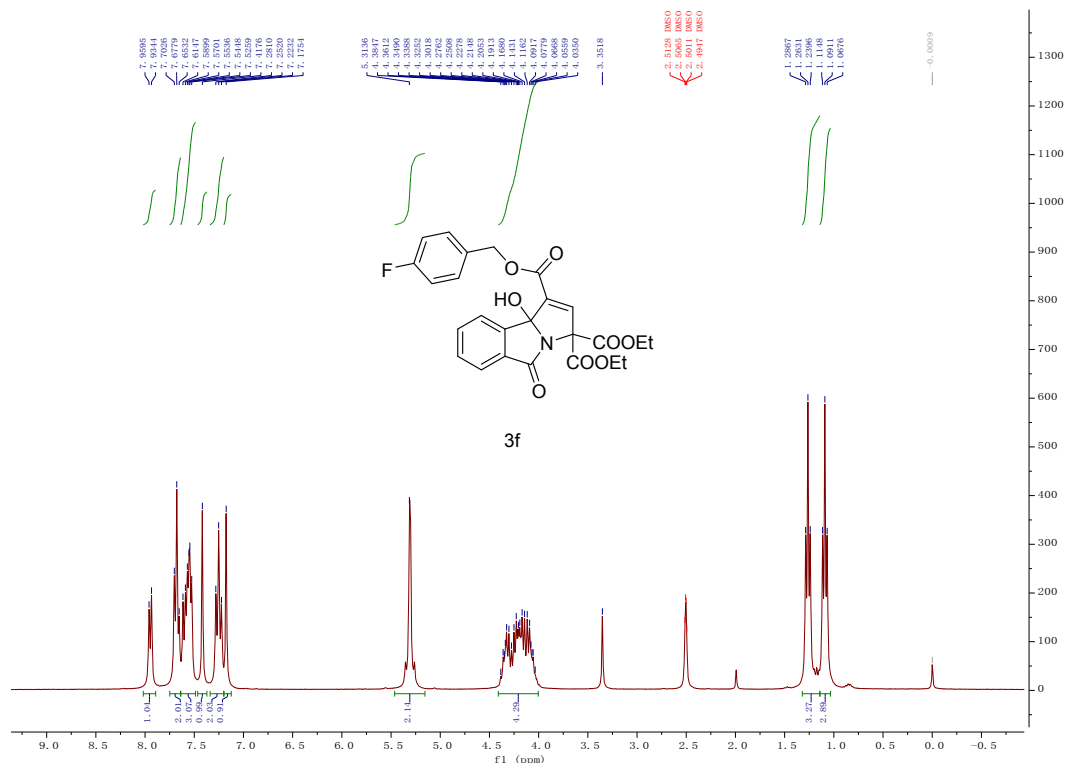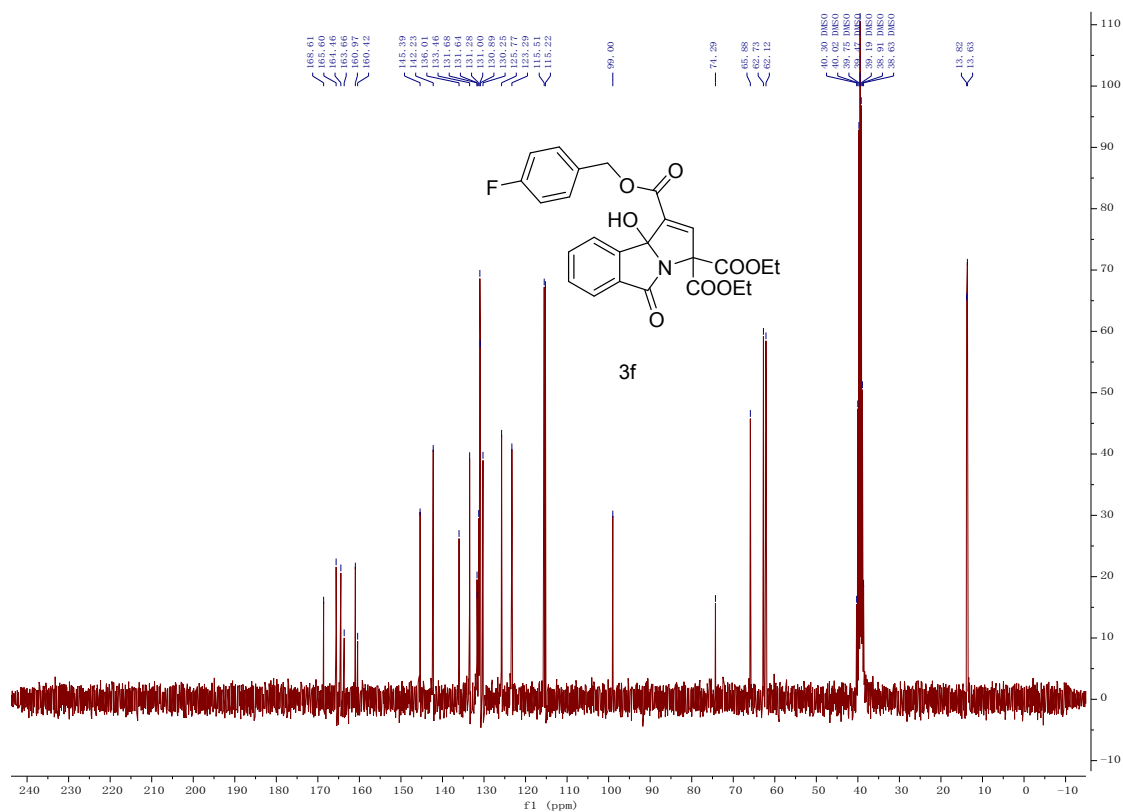

$^1\text{H}$  NMR (300 MHz) and  $^{13}\text{C}$  NMR (300 MHz) spectra of **3g** (DMSO)

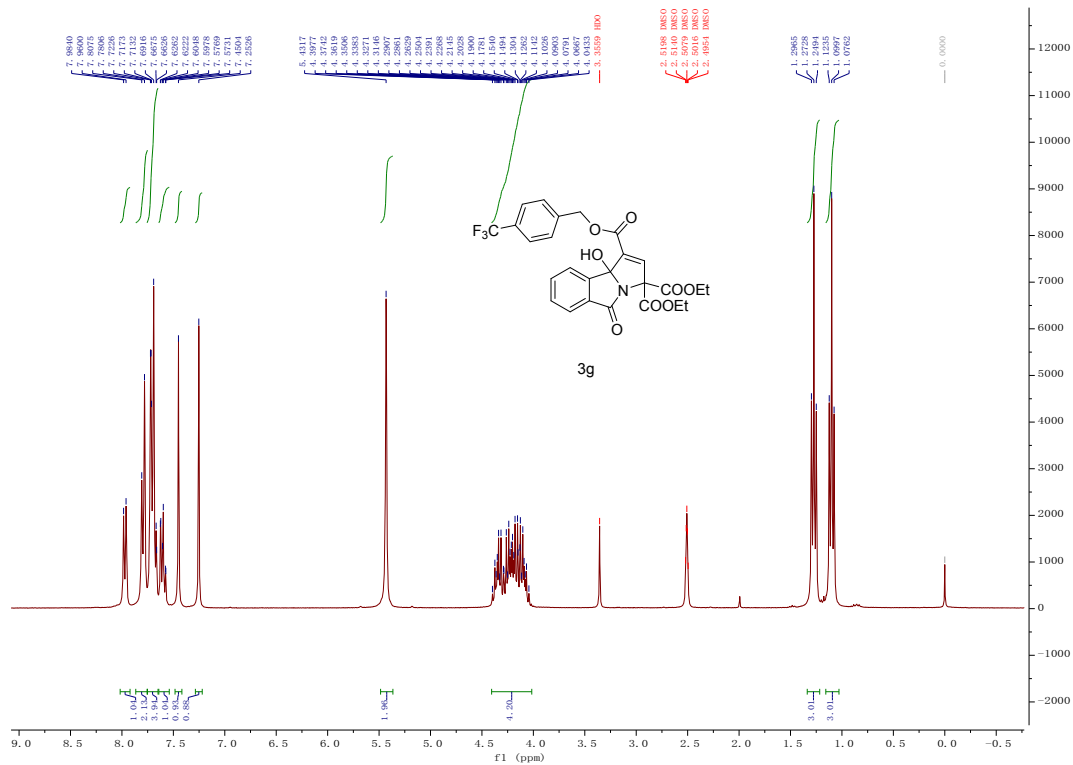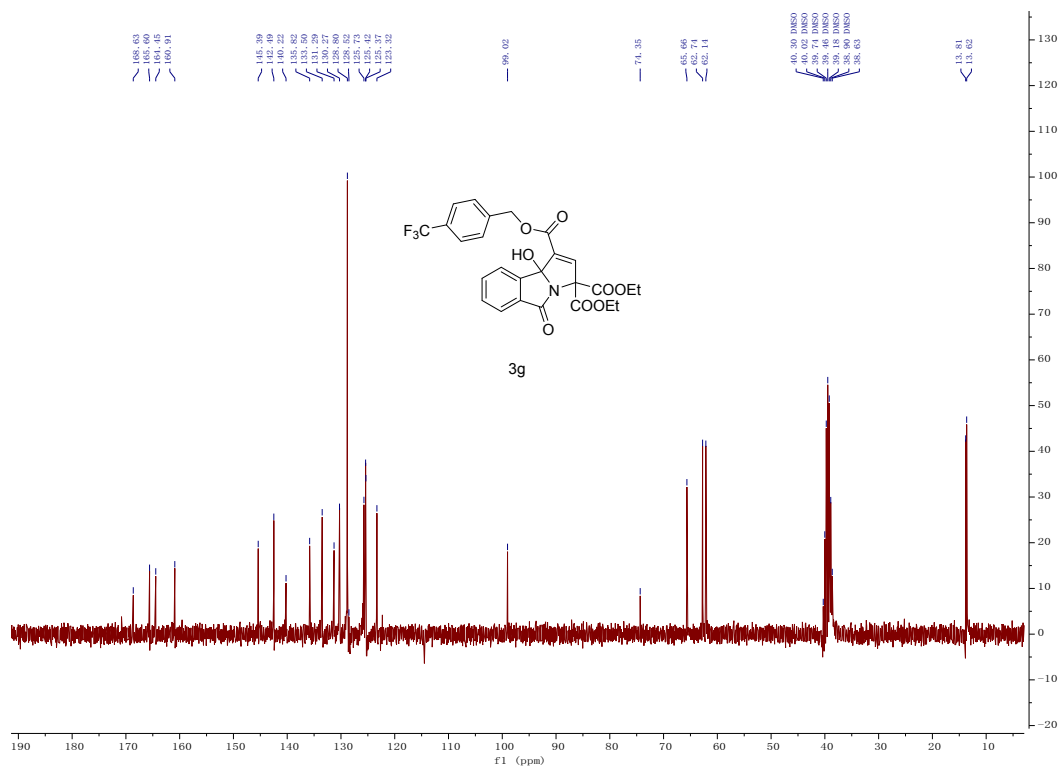

$^1\text{H}$  NMR (300 MHz) and  $^{13}\text{C}$  NMR (300 MHz) spectra of **3h** (DMSO)

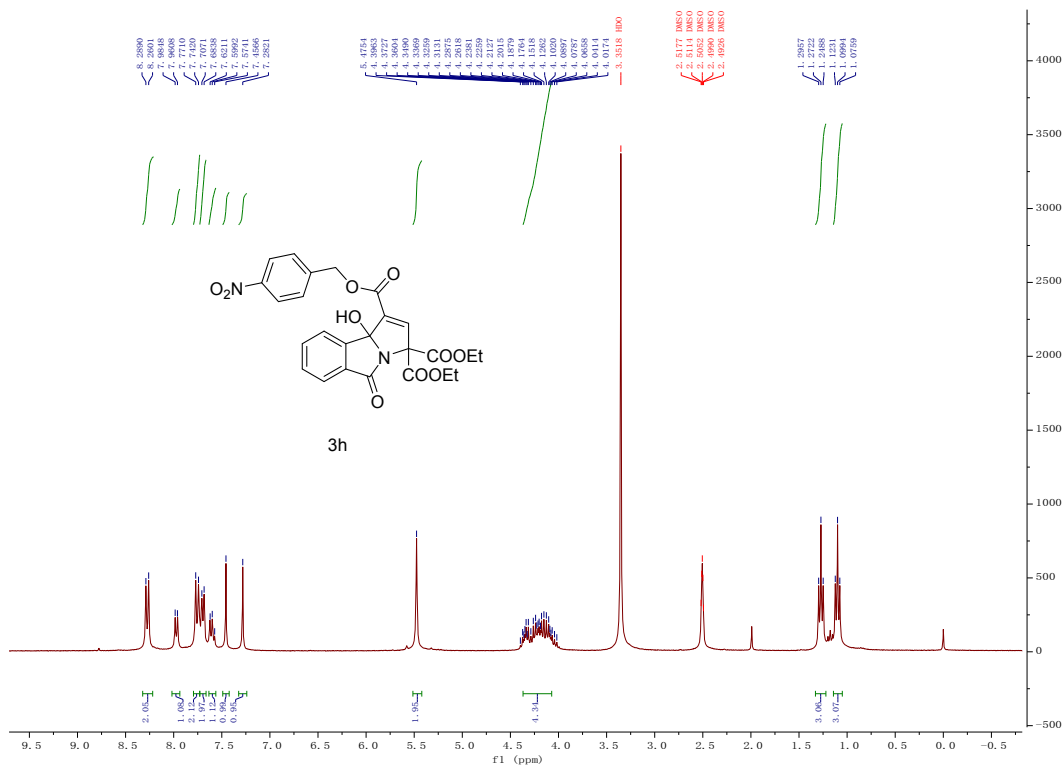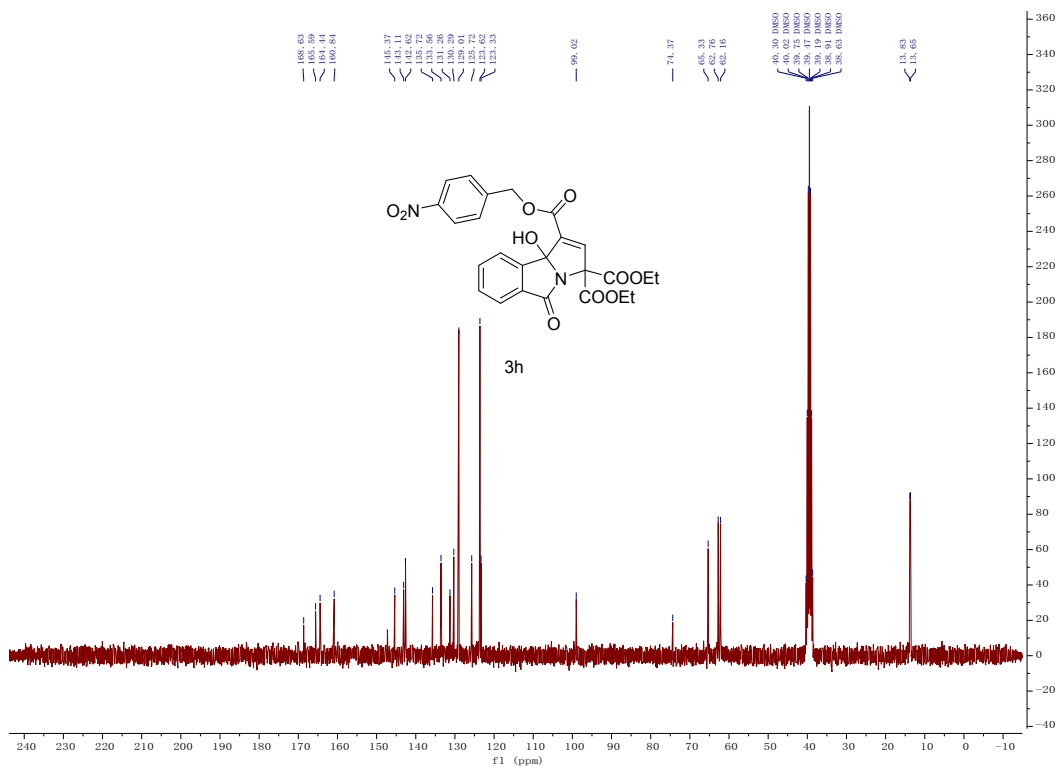

$^1\text{H}$  NMR (300 MHz) and  $^{13}\text{C}$  NMR (300 MHz) spectra of **3i** (DMSO)

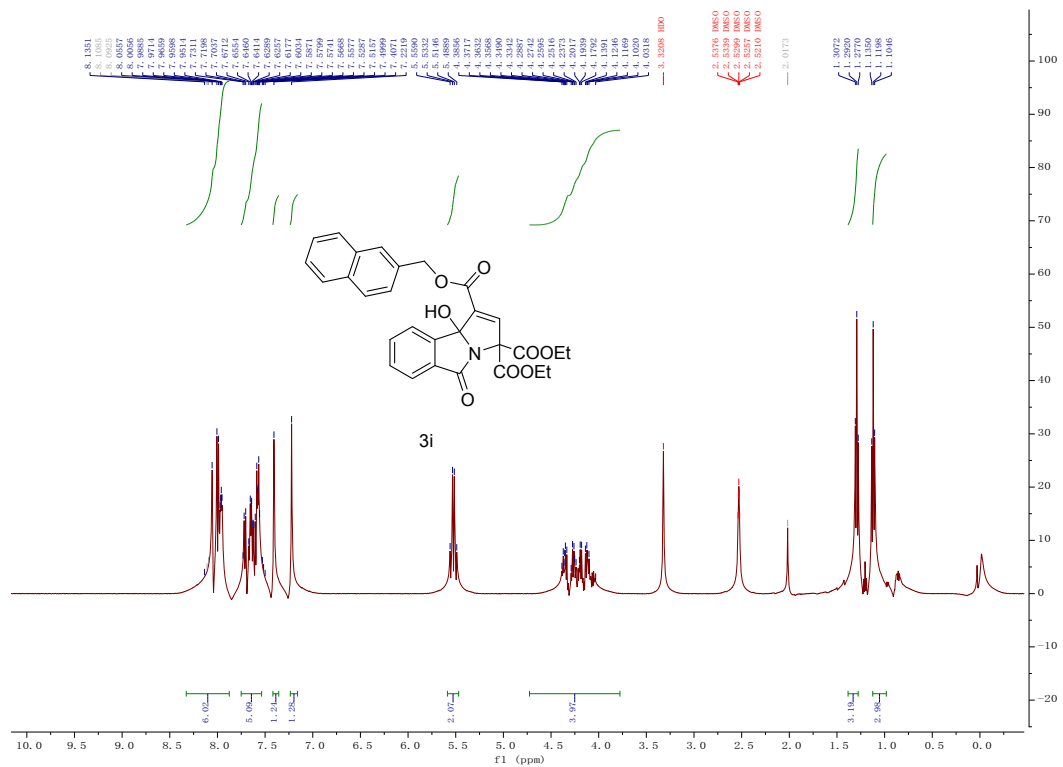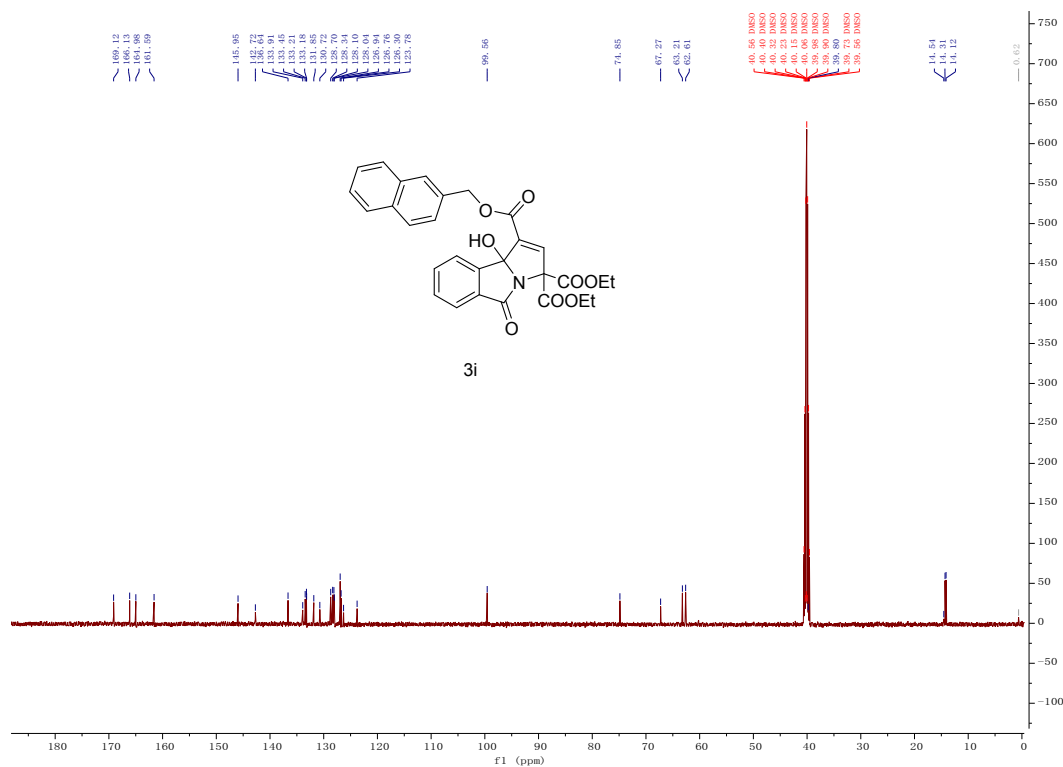

$^1\text{H}$  NMR (300 MHz) and  $^{13}\text{C}$  NMR (300 MHz) spectra of **3j** (DMSO)

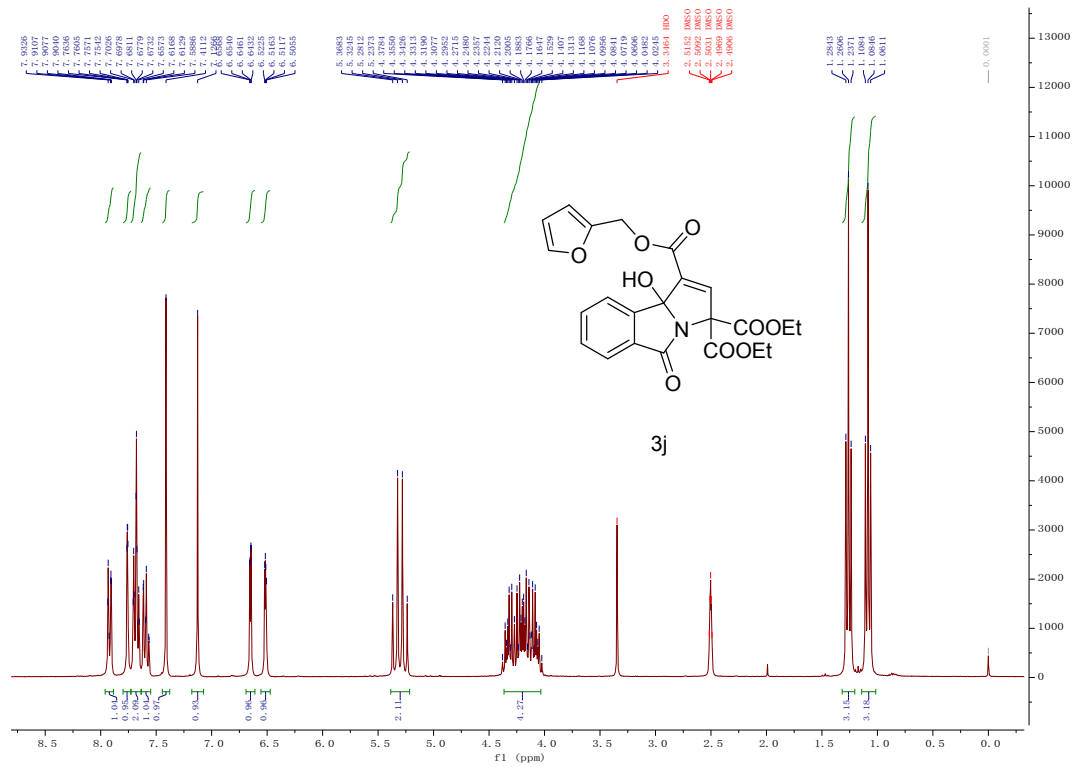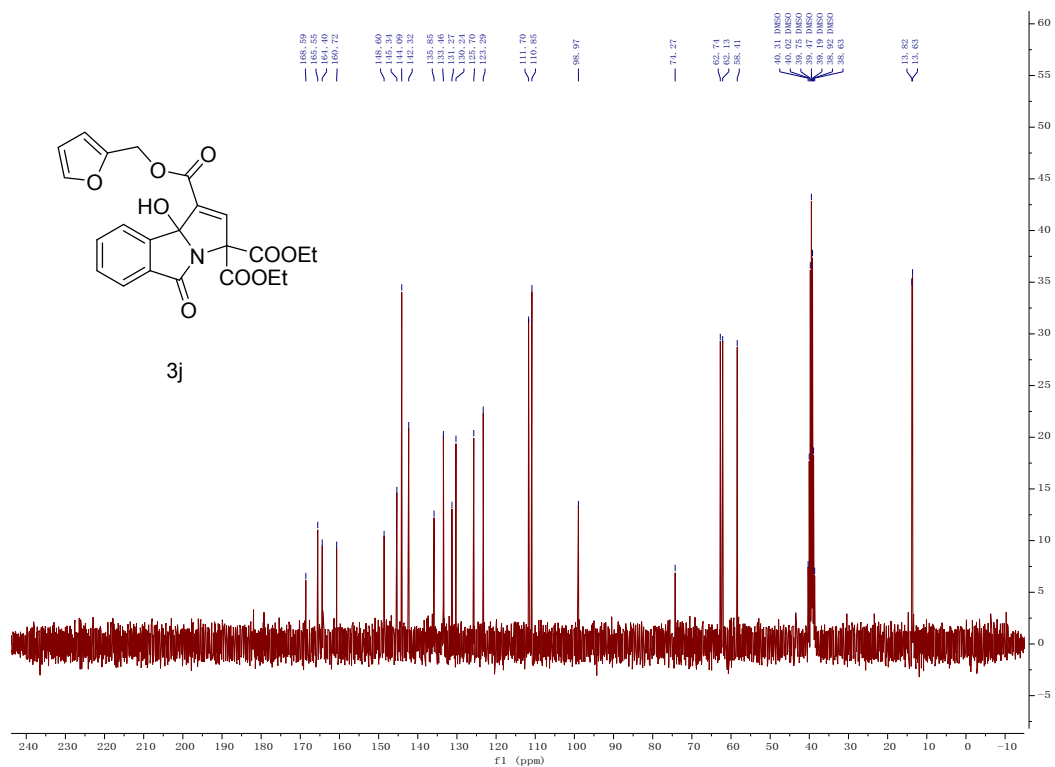

$^1\text{H}$  NMR (300 MHz) and  $^{13}\text{C}$  NMR (300 MHz) spectra of **3k** (DMSO)

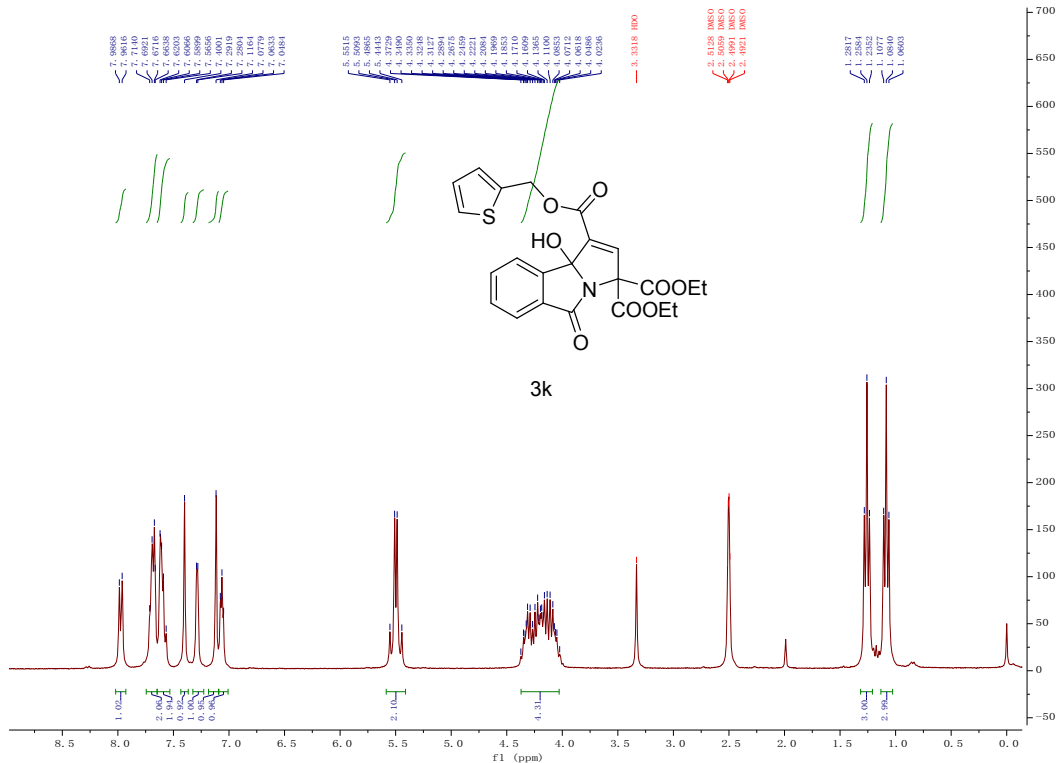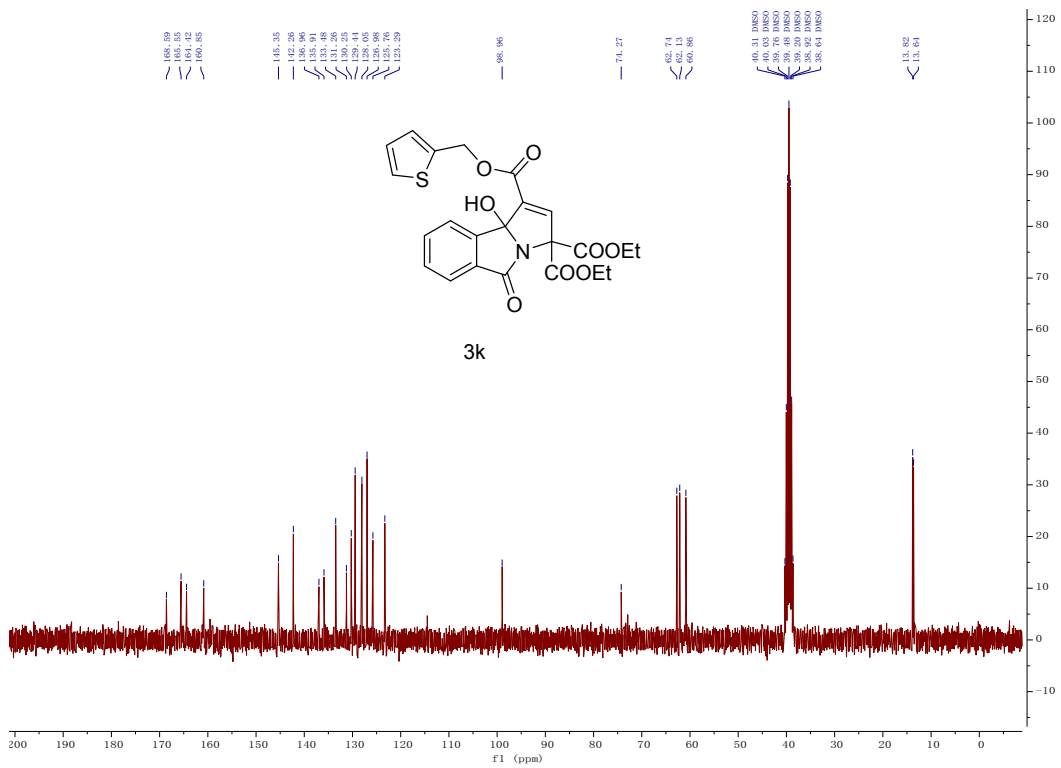

$^1\text{H}$  NMR (300 MHz) and  $^{13}\text{C}$  NMR (300 MHz) spectra of **3l** (DMSO)

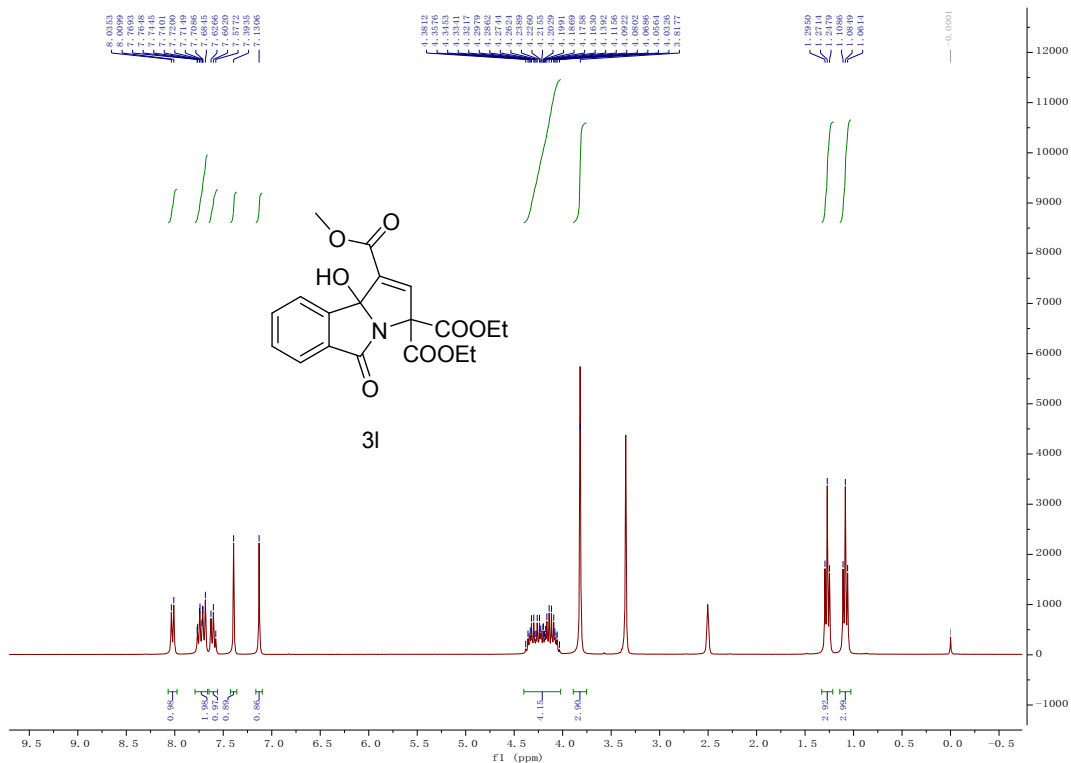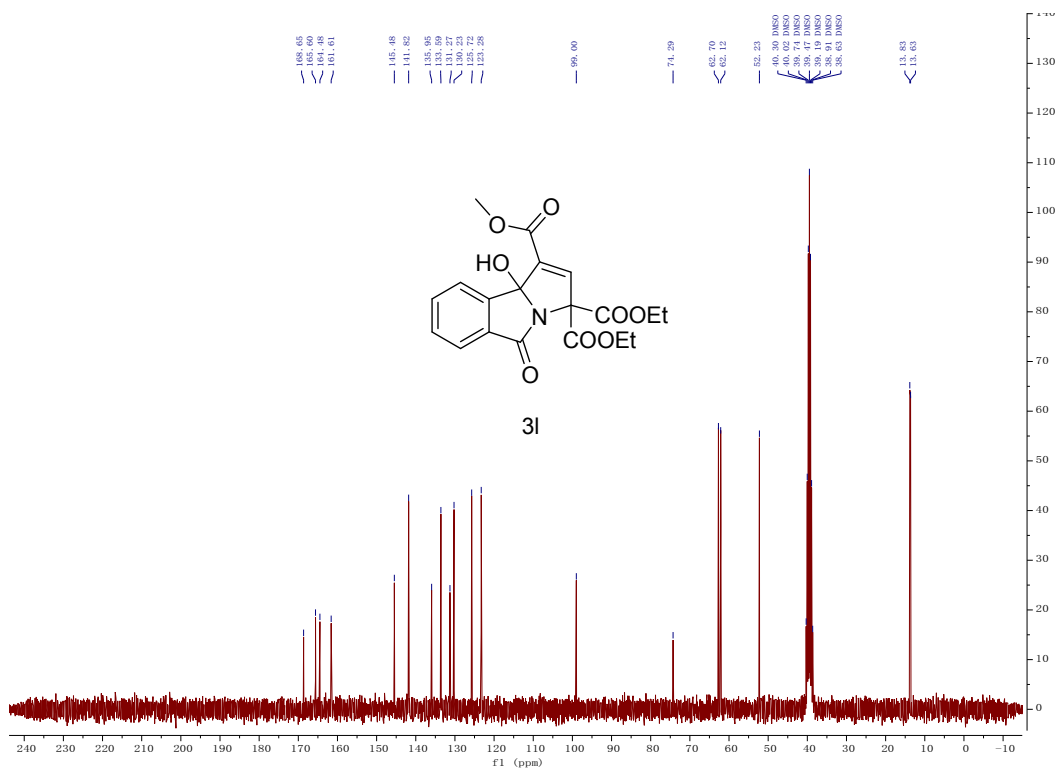

$^1\text{H}$  NMR (300 MHz) and  $^{13}\text{C}$  NMR (300 MHz) spectra of **3m** (DMSO)

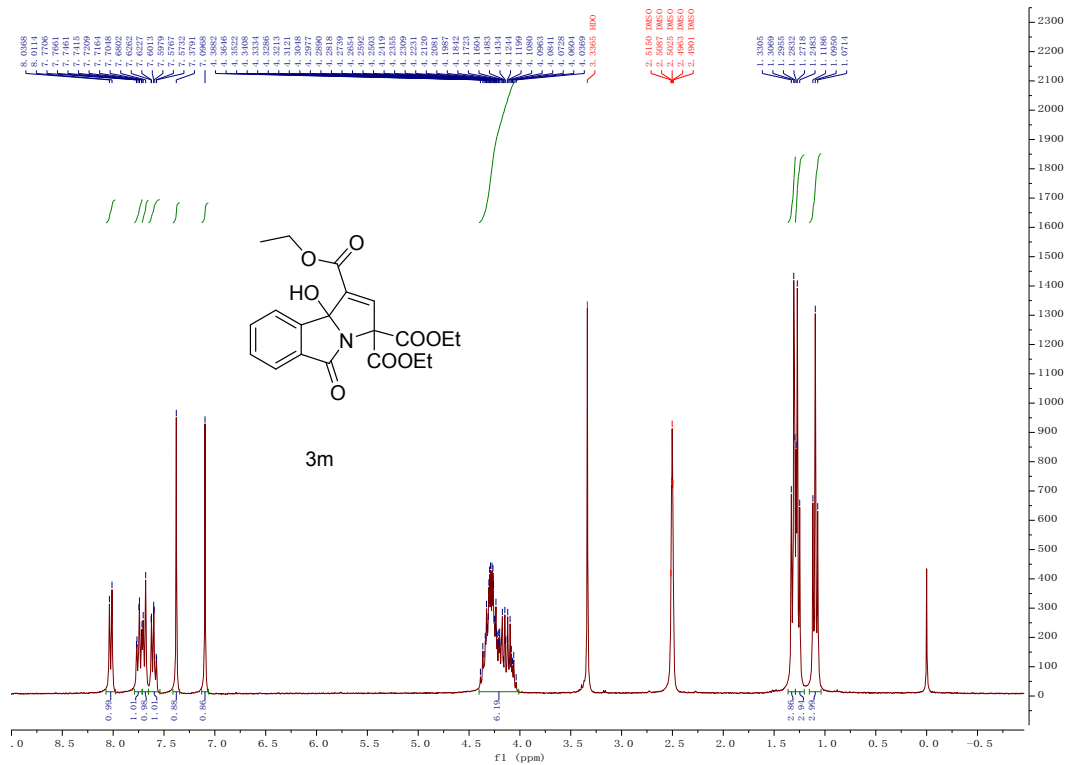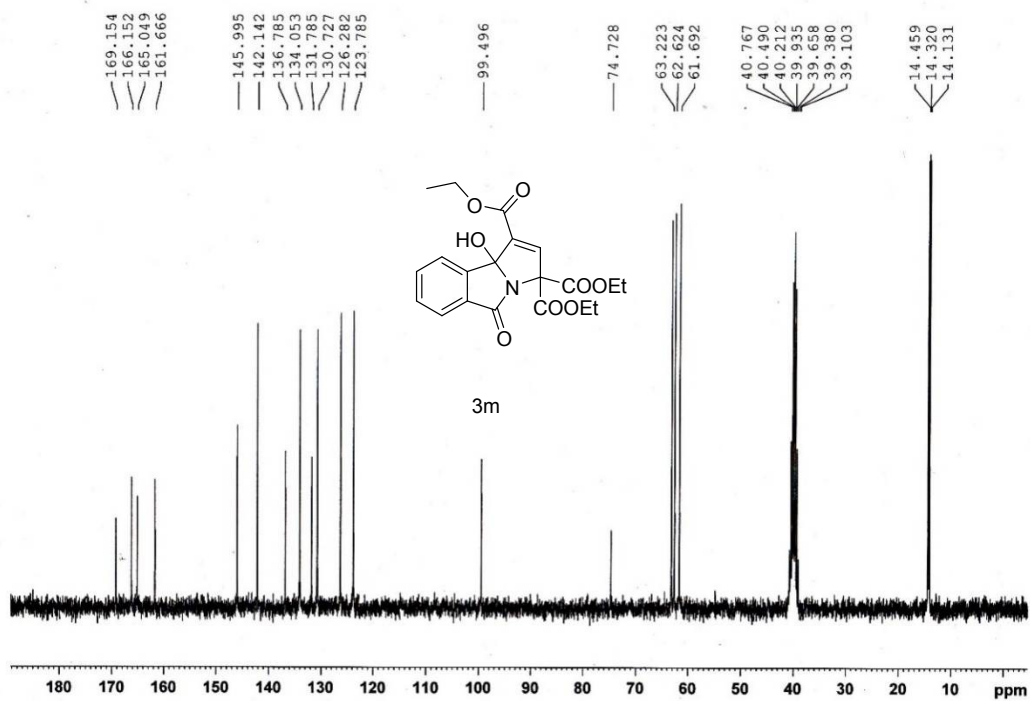



$^1\text{H}$  NMR (300 MHz) and  $^{13}\text{C}$  NMR (300 MHz) spectra of **3n** (DMSO)

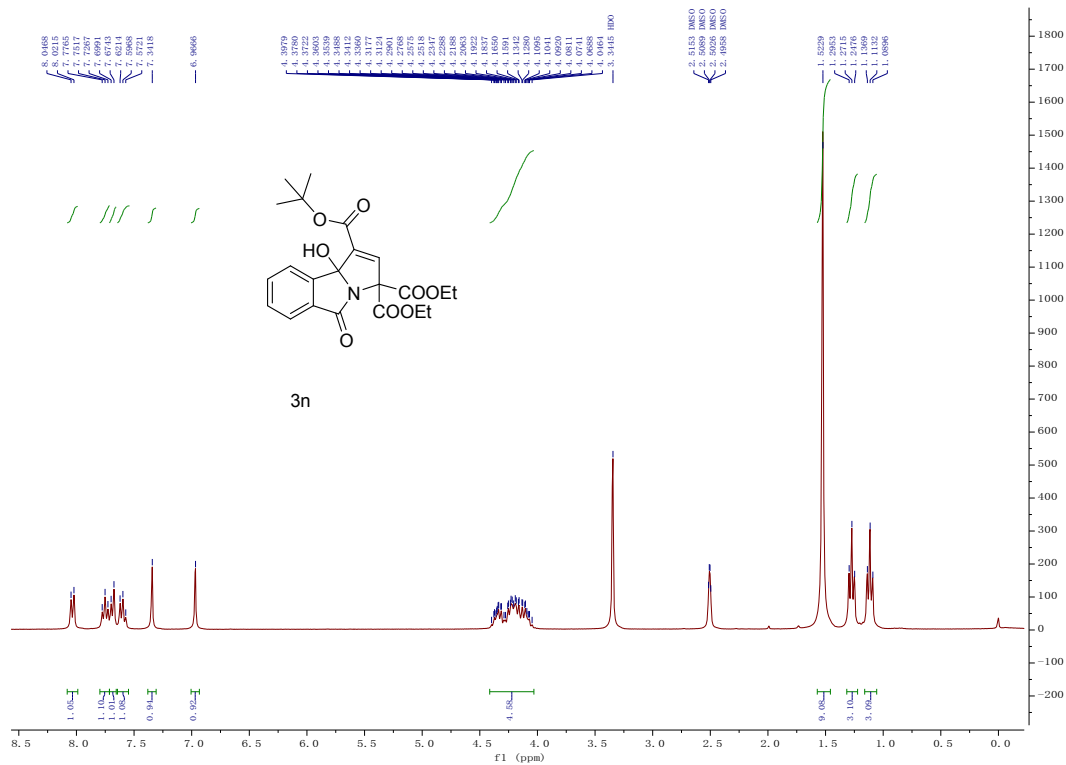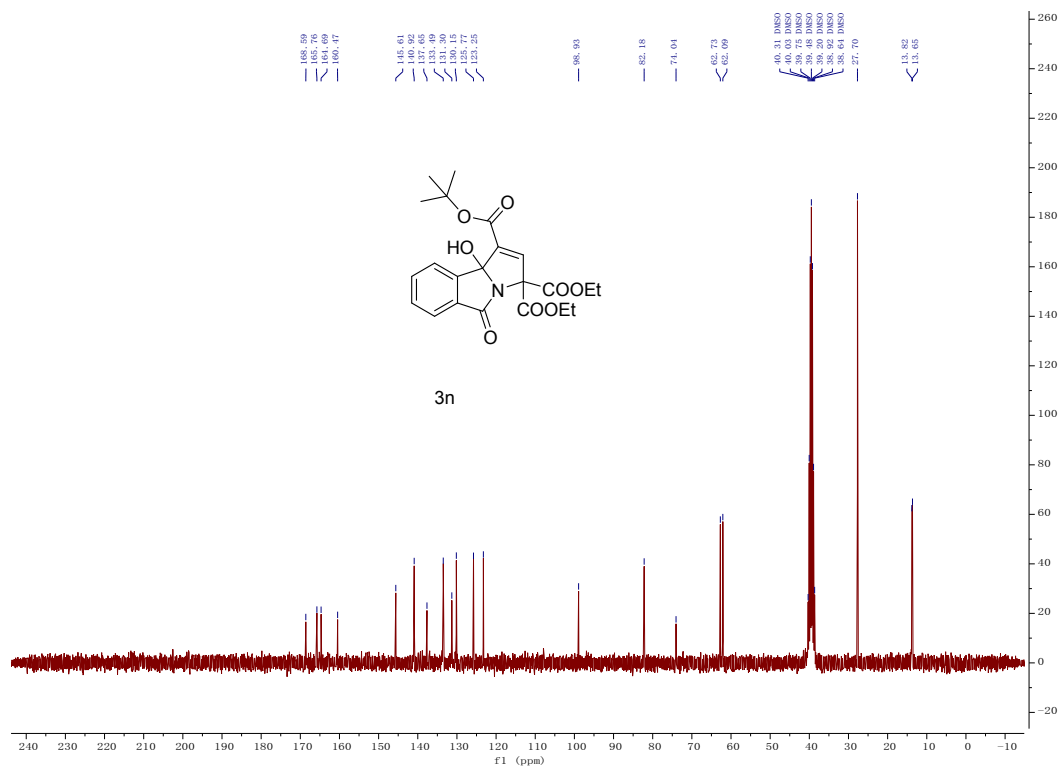

$^1\text{H}$  NMR (300 MHz) and  $^{13}\text{C}$  NMR (300 MHz) spectra of **3p** (DMSO)

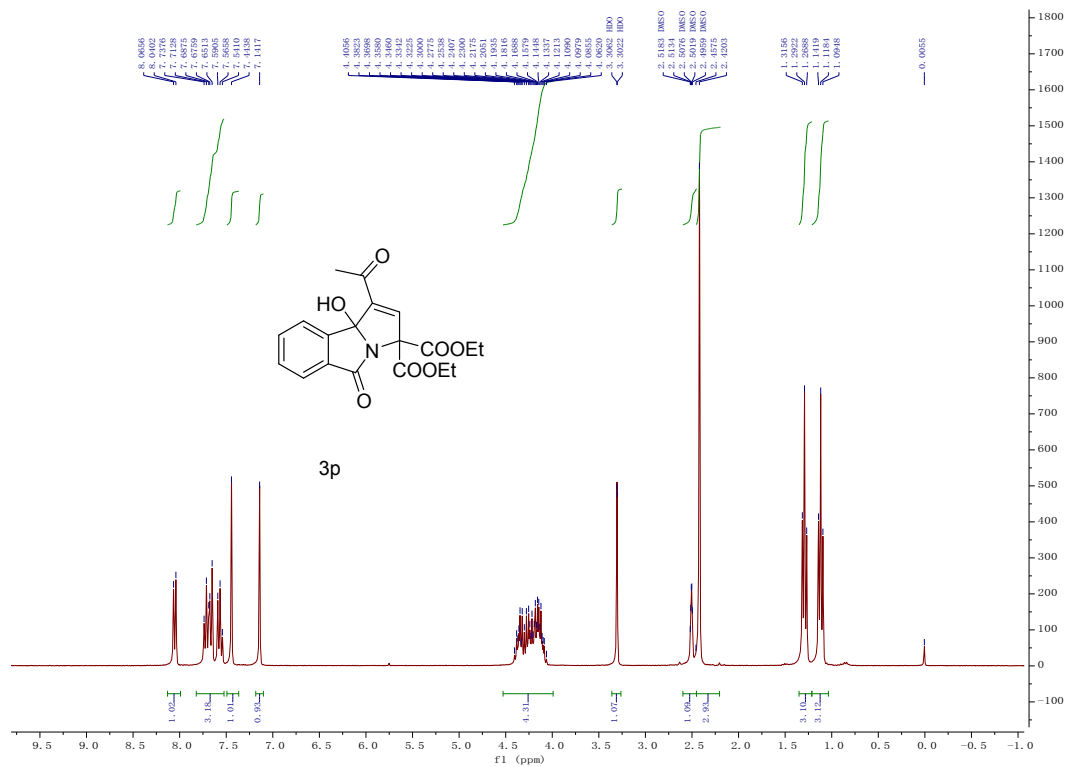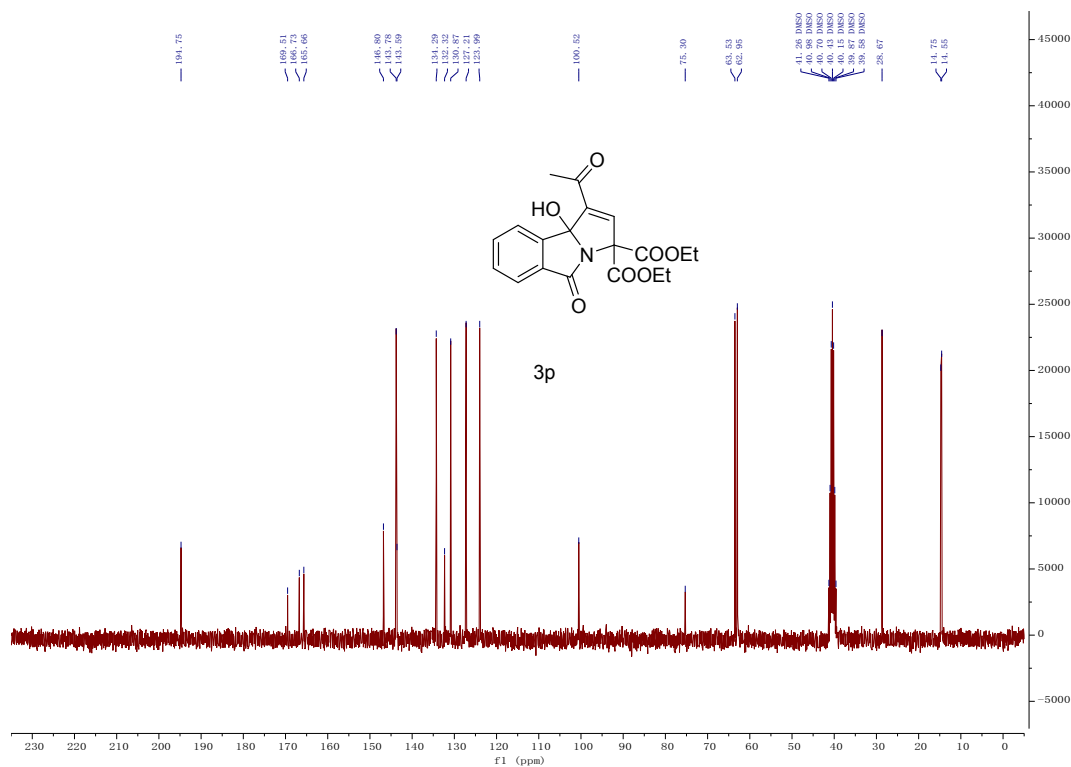

$^1\text{H}$  NMR (300 MHz) and  $^{13}\text{C}$  NMR (300 MHz) spectra of **3q** (DMSO)

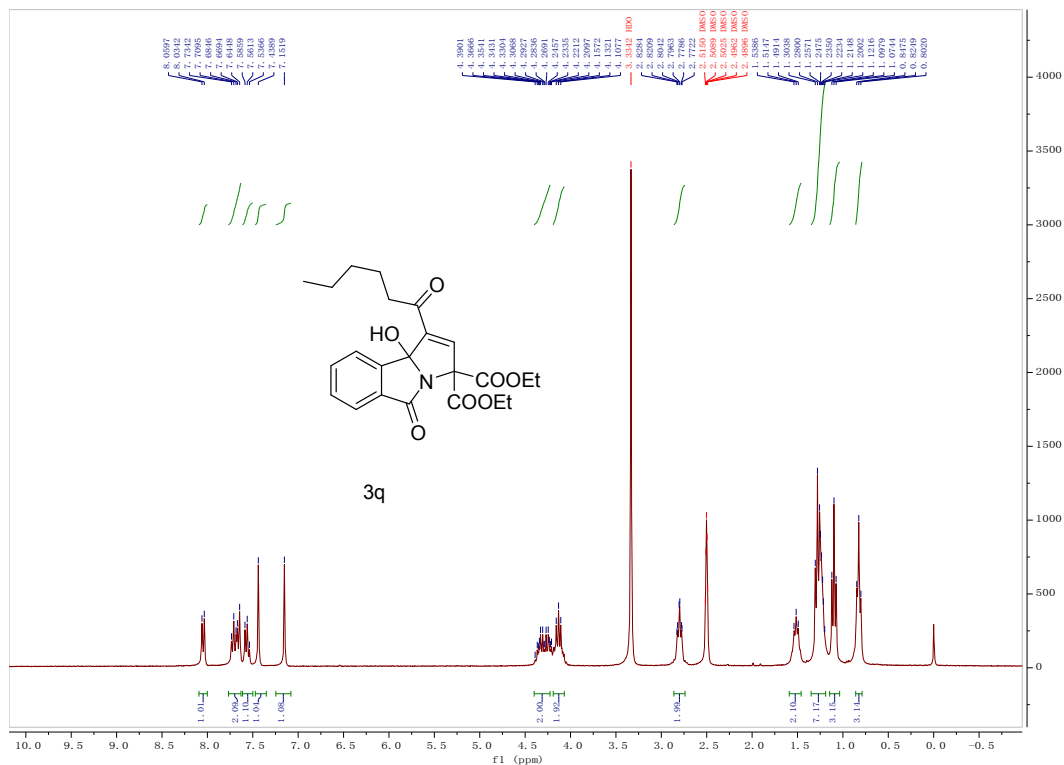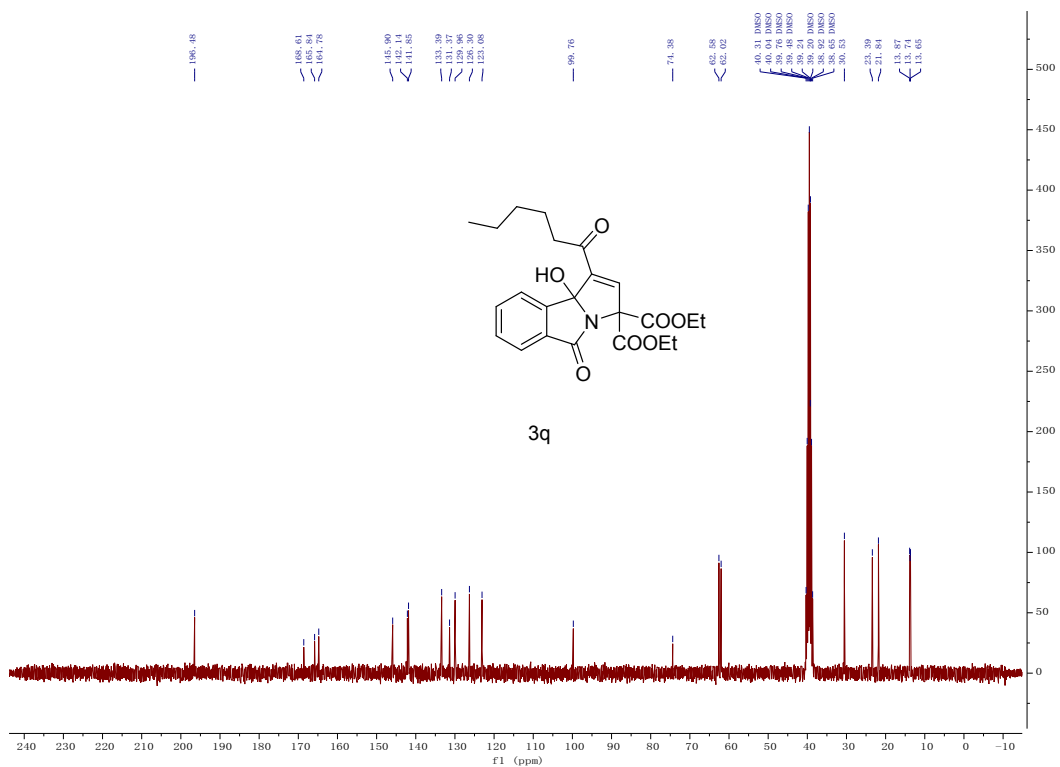

$^1\text{H}$  NMR (300 MHz) and  $^{13}\text{C}$  NMR (300 MHz) spectra of **3r** (DMSO)

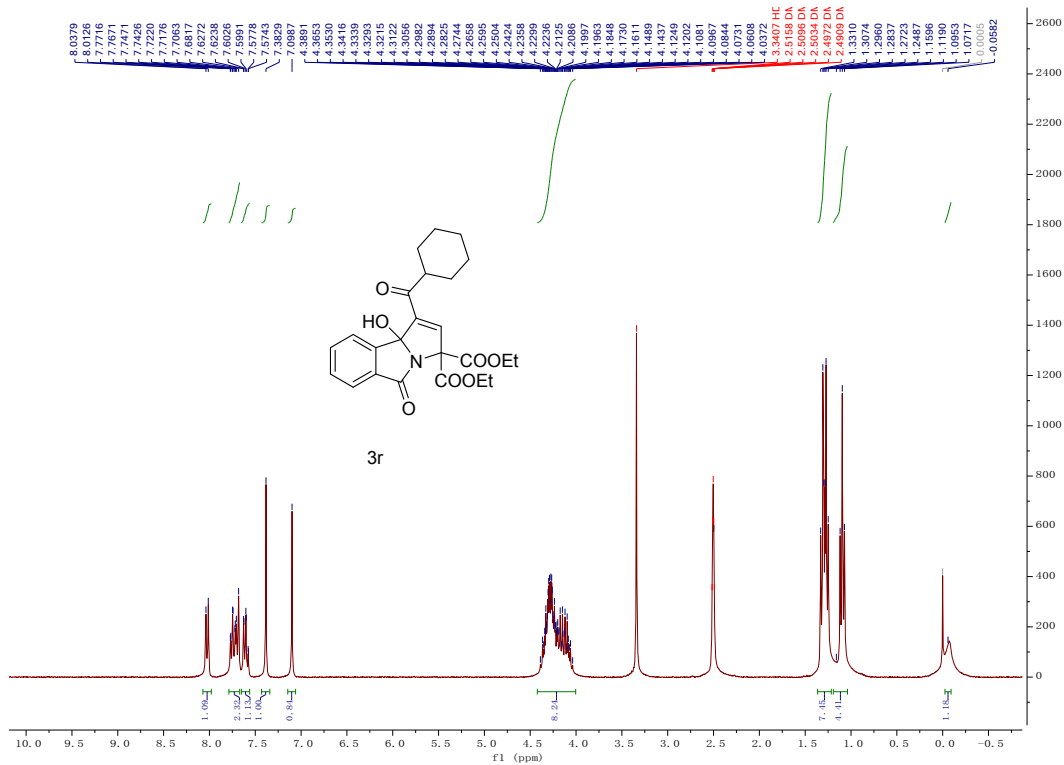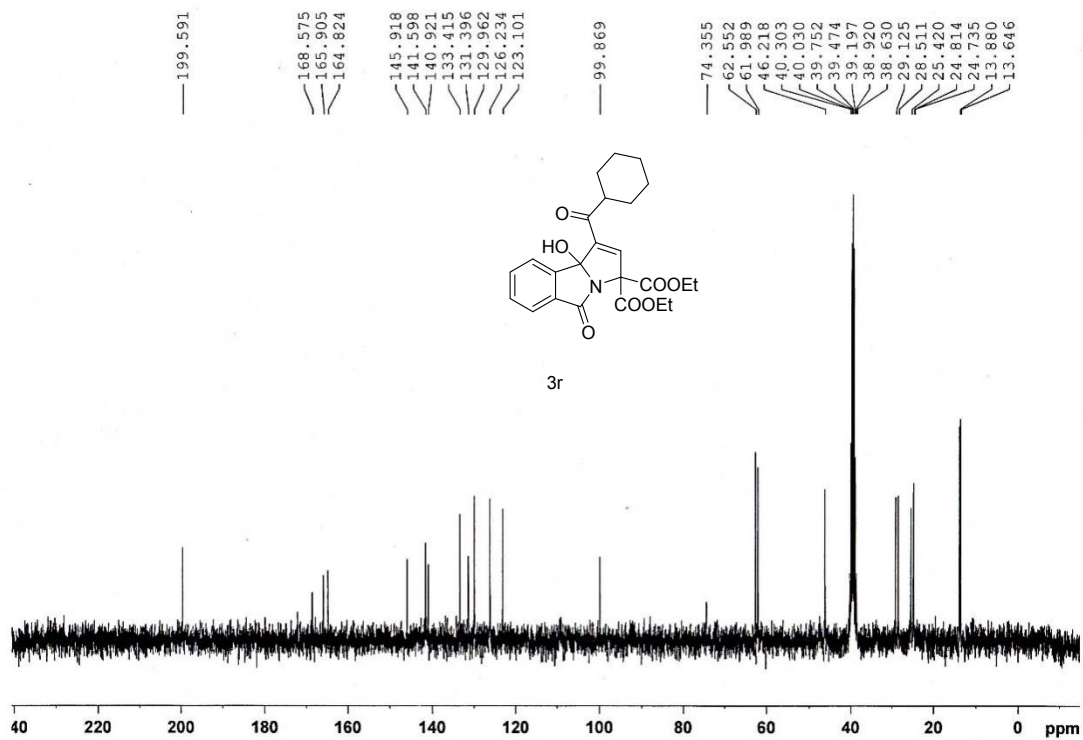

$^1\text{H}$  NMR (300 MHz) and  $^{13}\text{C}$  NMR (300 MHz) spectra of 3s (DMSO)

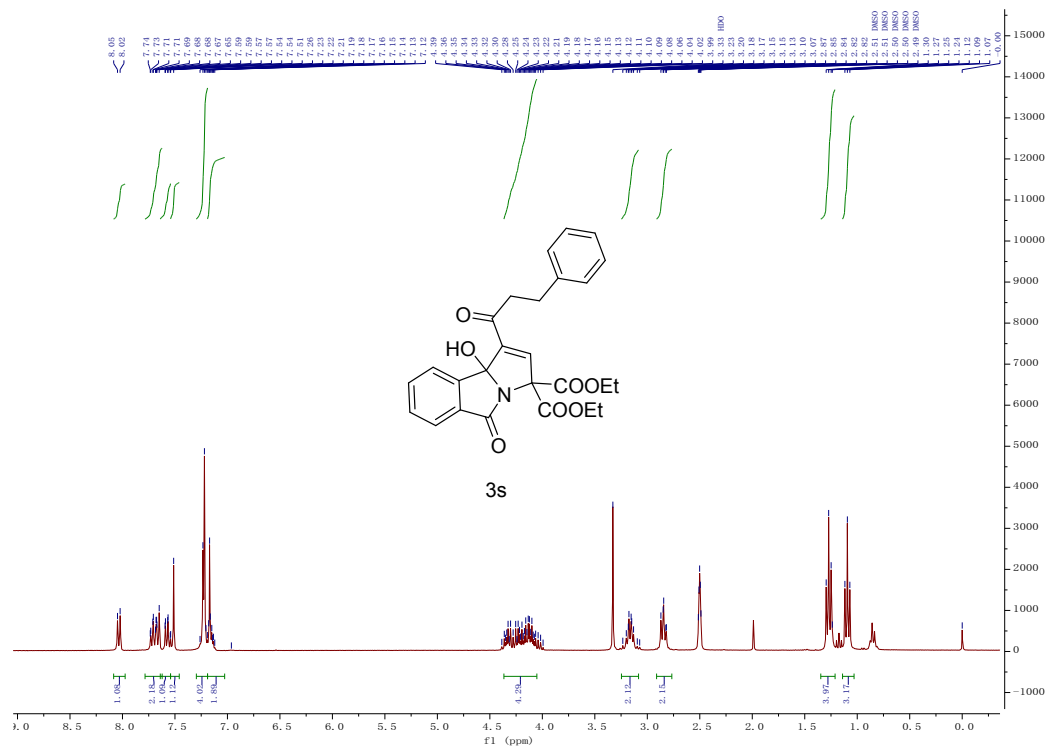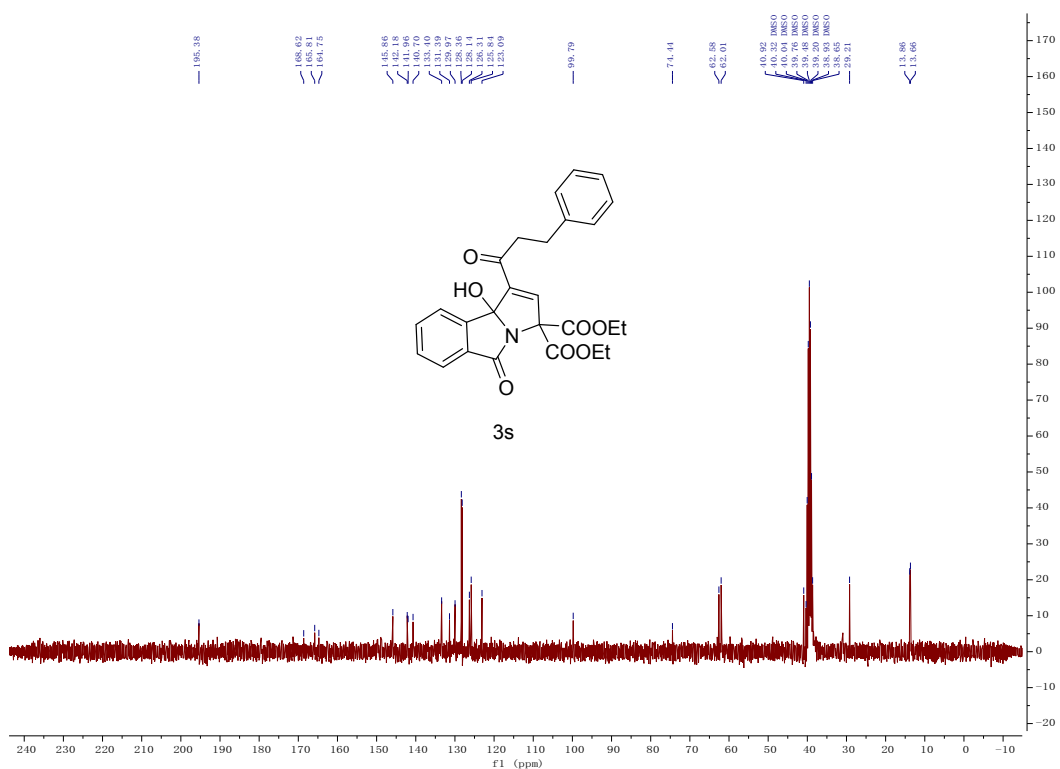

$^1\text{H}$  NMR (300 MHz) and  $^{13}\text{C}$  NMR (300 MHz) spectra of **3u** (DMSO)

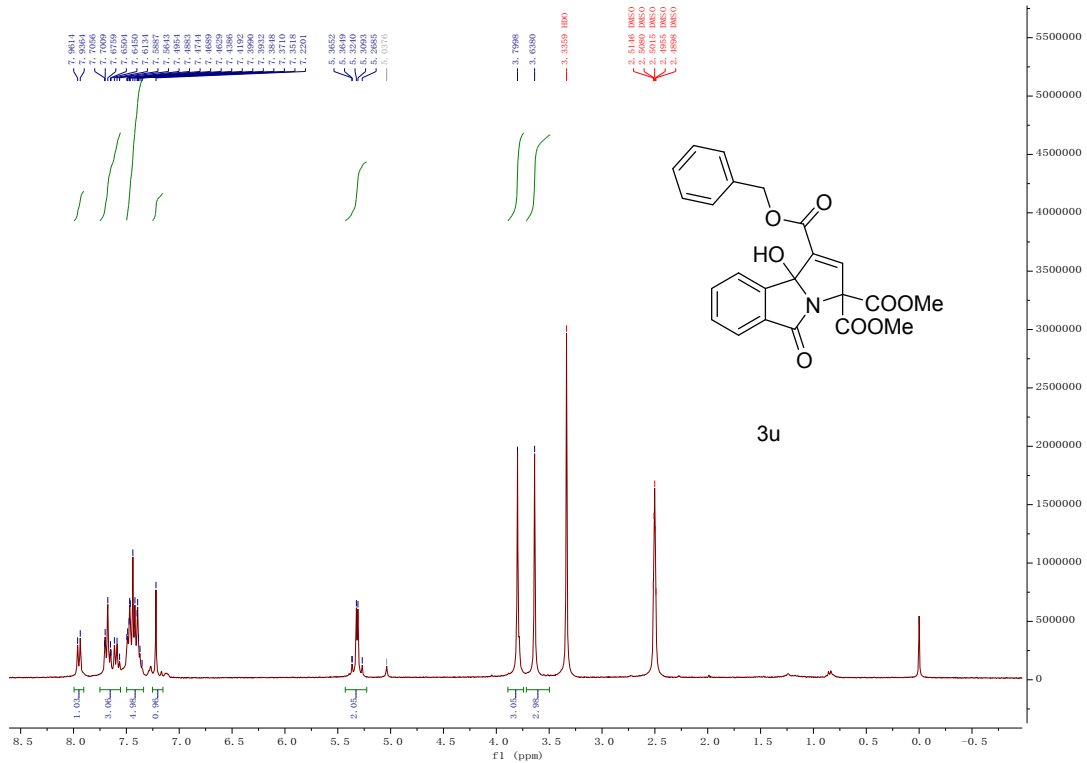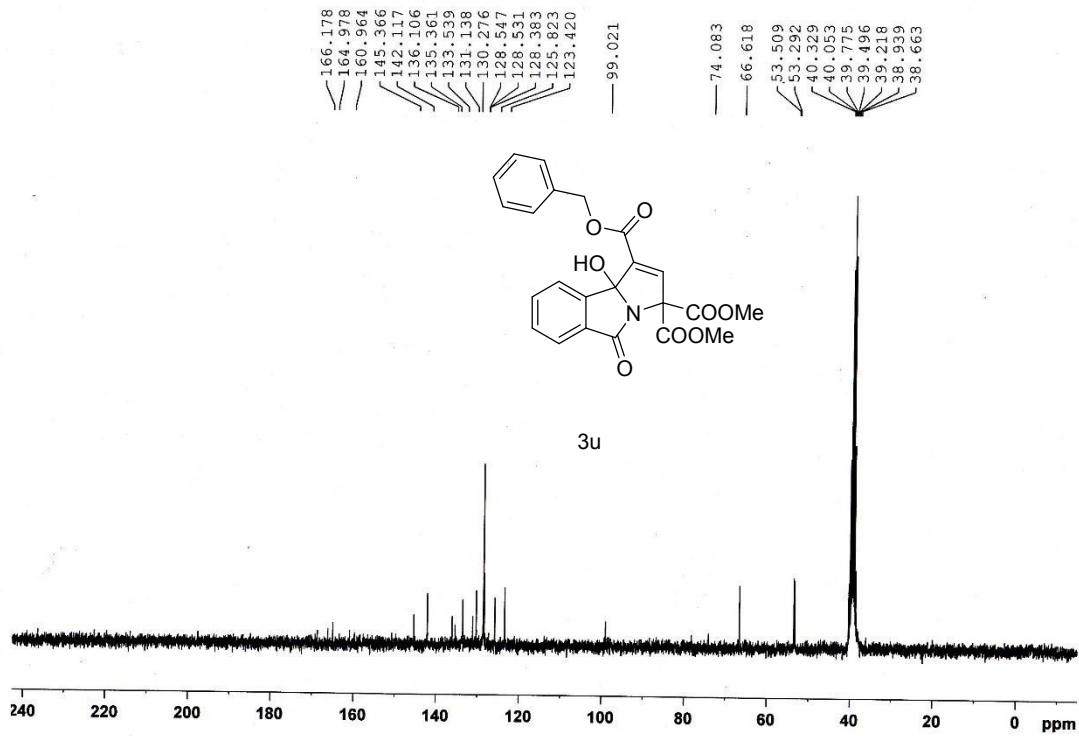

$^1\text{H}$  NMR (300 MHz) and  $^{13}\text{C}$  NMR (300 MHz) spectra of **3v** (DMSO)

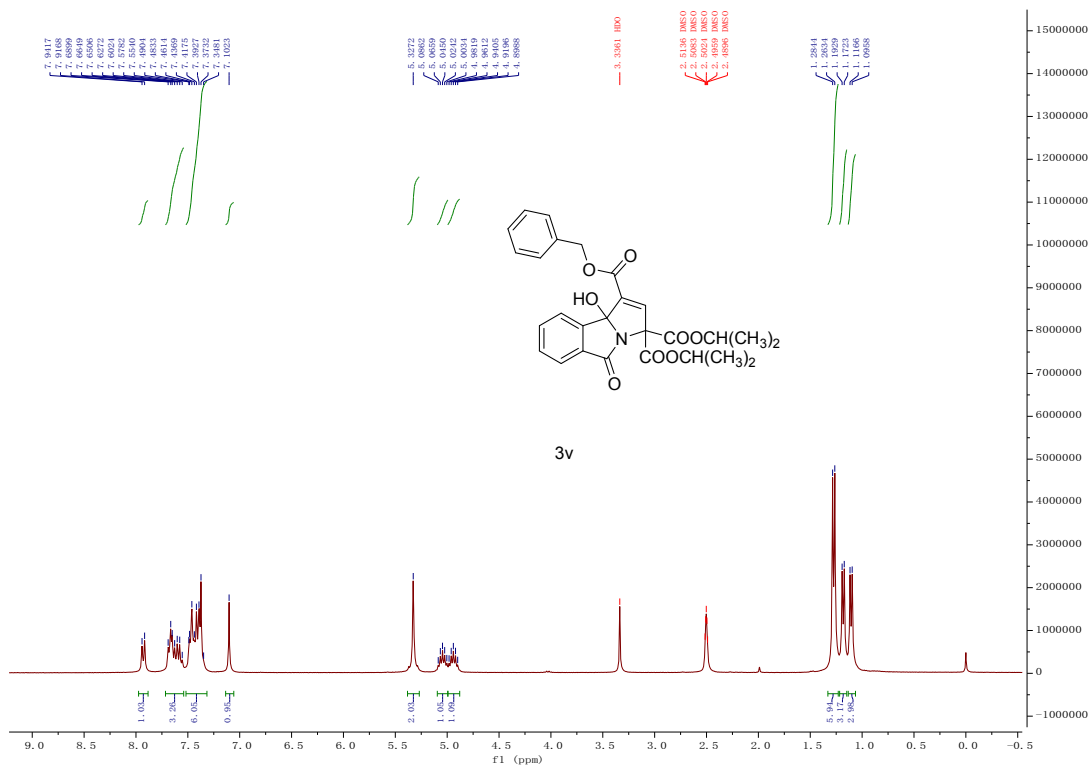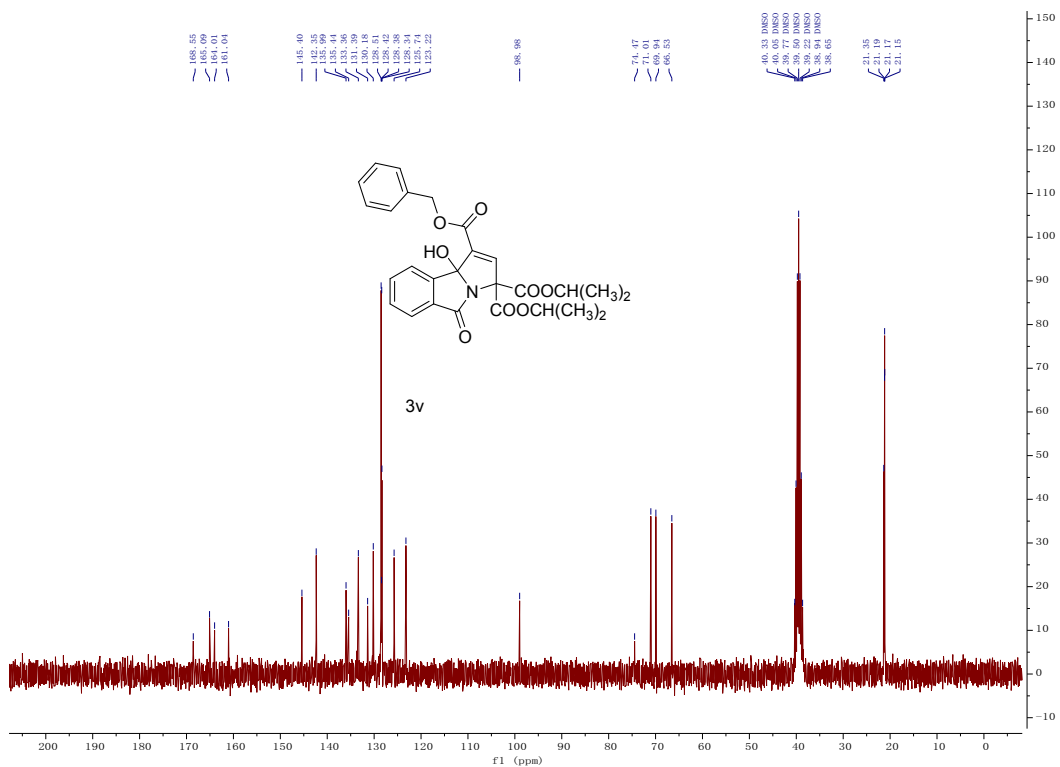

$^1\text{H}$  NMR (300 MHz) and  $^{13}\text{C}$  NMR (300 MHz) spectra of **4** (DMSO)

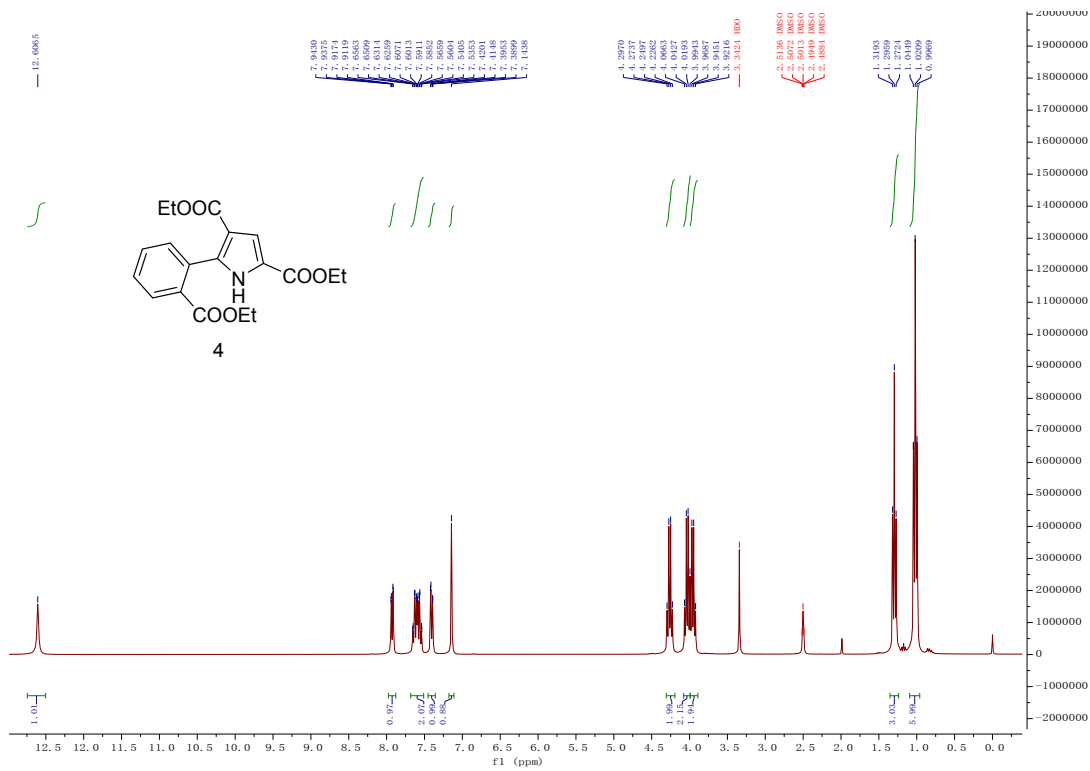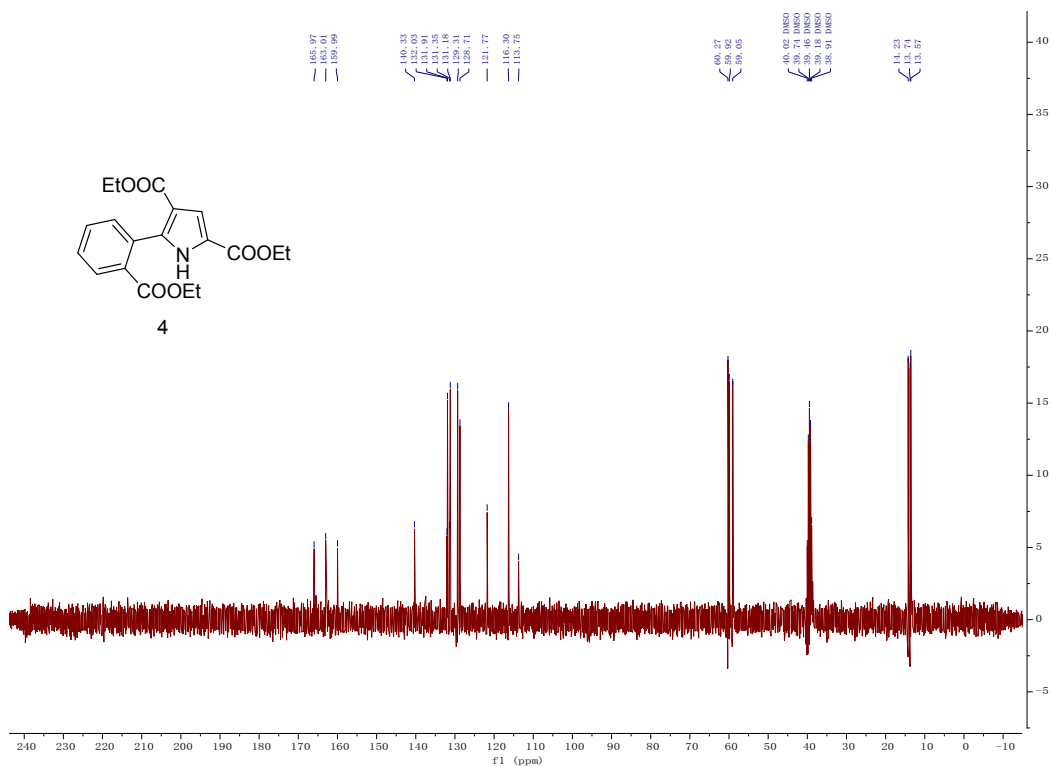



$^1\text{H}$  NMR (300 MHz) and  $^{13}\text{C}$  NMR (300 MHz) spectra of **5** (DMSO)

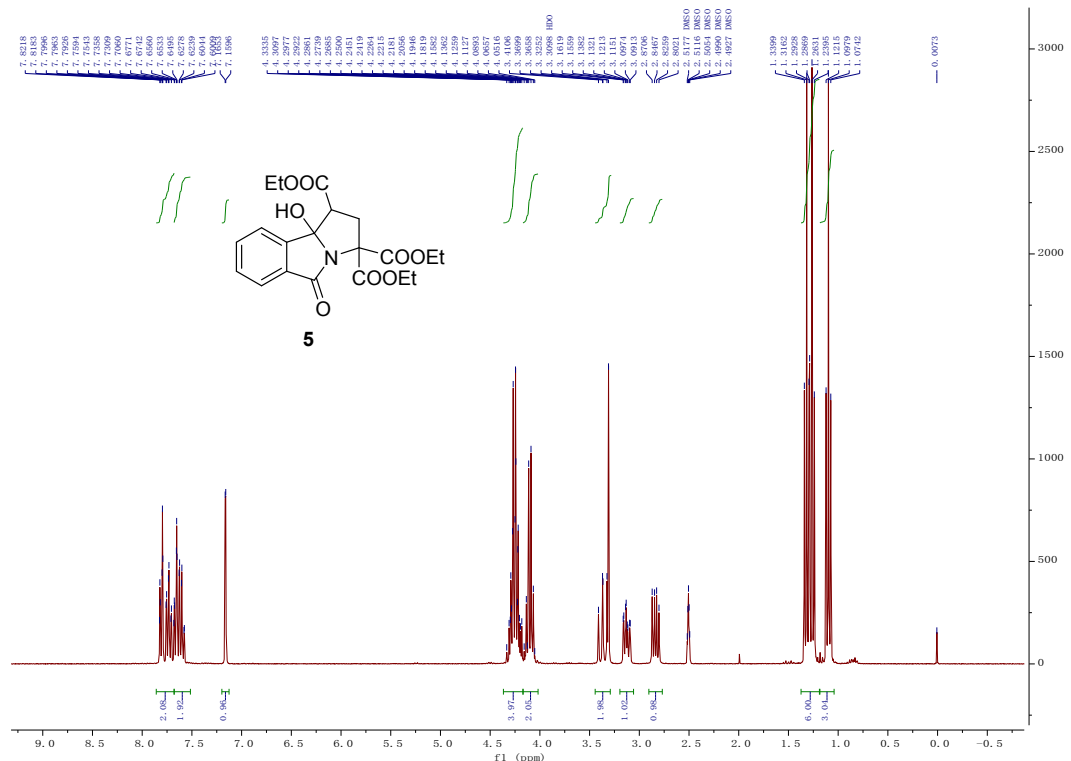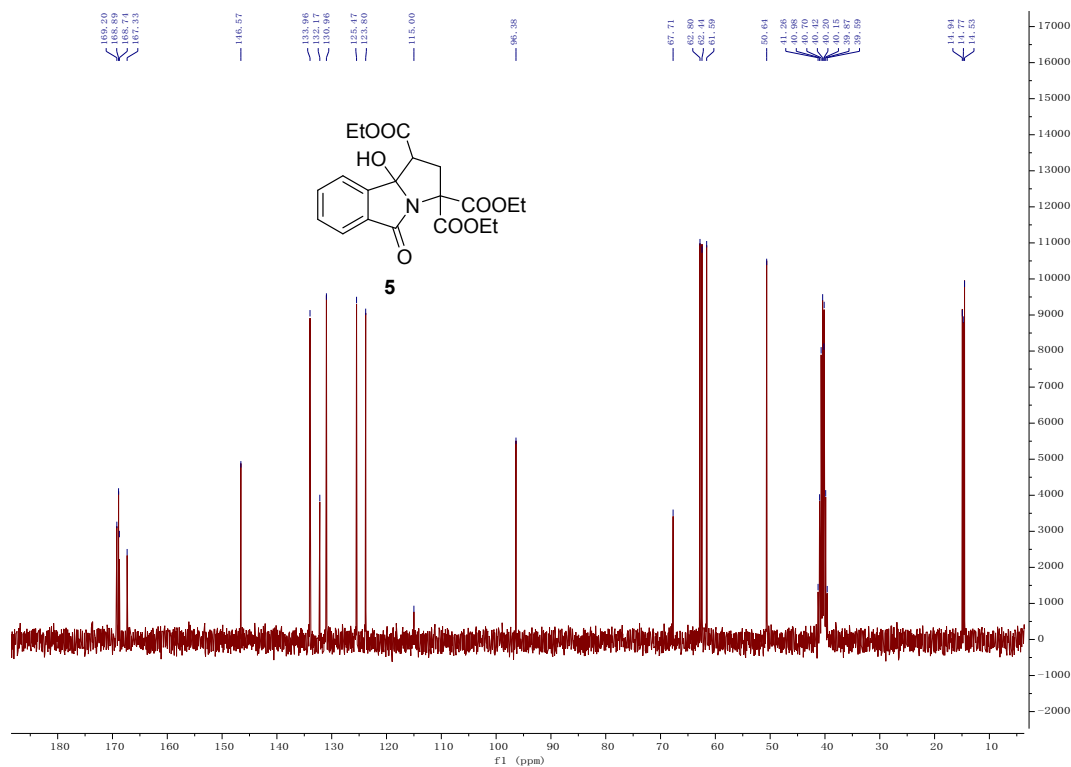

$^1\text{H}$  NMR (300 MHz) and  $^{13}\text{C}$  NMR (300 MHz) spectra of **6**(DMSO)

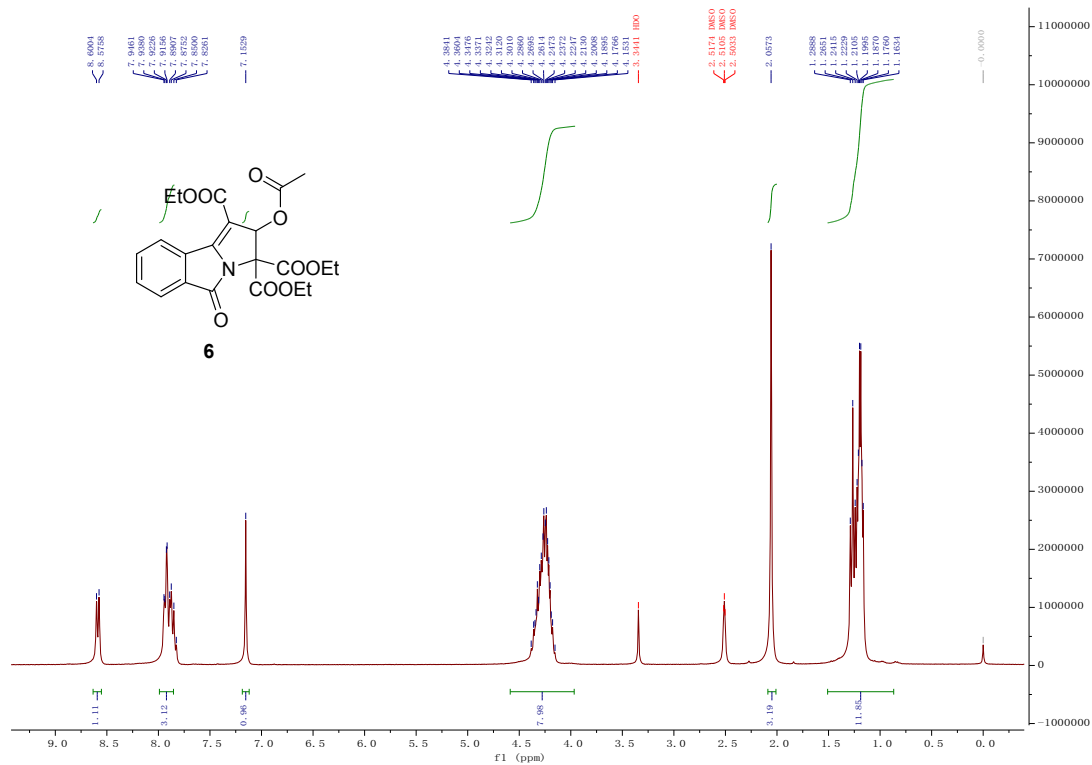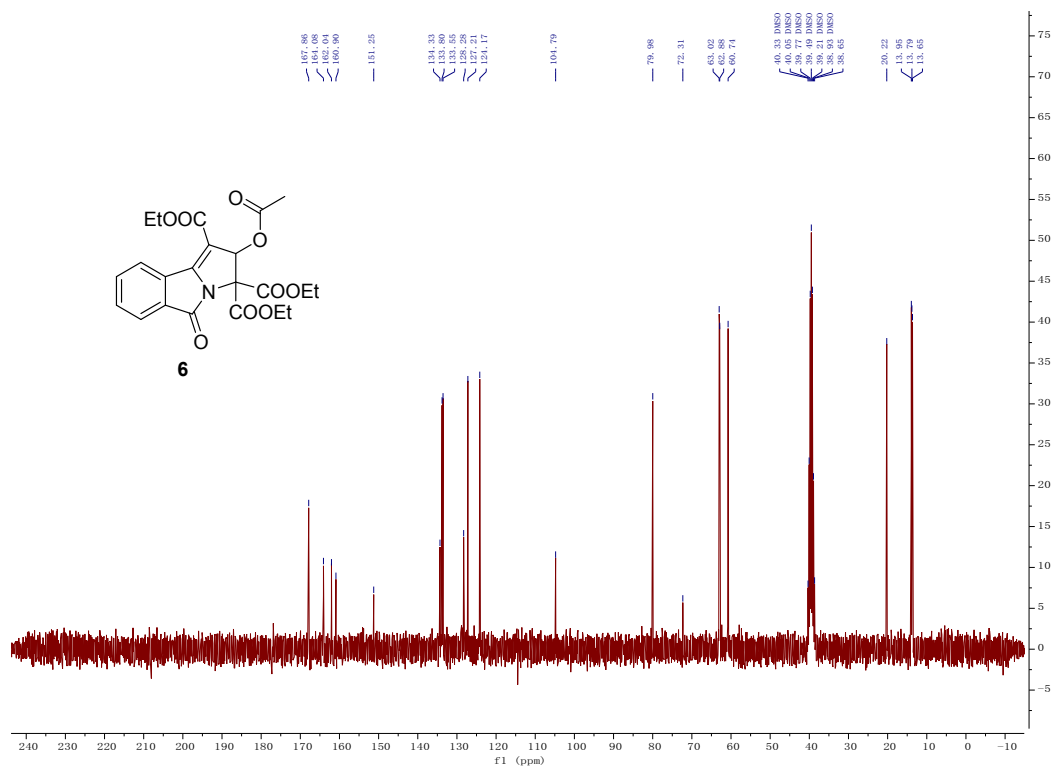

Supplement: c6qo00544f1.pdf [file c6qo00544f1.pdf]
